## Asymmetric requirement of Dpp/BMP morphogen dispersal in the *Drosophila* wing disc

Shinya Matsuda<sup>\*1</sup>, Jonas V. Schaefer<sup>2</sup>, Yusuke Mii<sup>3</sup>, Yutaro Hori<sup>4</sup>, Dimitri Bieli<sup>1</sup>, Masanori Taira<sup>5</sup>,  
Andreas Plückthun<sup>2</sup>, and Markus Affolter<sup>\*1</sup>

### Affiliations:

1. Biozentrum, University of Basel, Switzerland
2. Department of Biochemistry, University of Zurich, Switzerland
3. National Institute for Basic Biology and Exploratory Research Center on Life and Living Systems (ExCELLS), National Institutes of Natural Sciences, Japan  
JST, PRESTO, Japan
4. Institute for Quantitative Biosciences, The University of Tokyo, Japan
5. Department of Biological Sciences, Graduate School of Science, The University of Tokyo, Japan  
Present address: Department of Biological Sciences, Faculty of Science and Engineering, Chuo University, Japan

### Corresponding authors

Correspondence to: [markus.affolter@unibas.ch](mailto:markus.affolter@unibas.ch) or [shinya.matsuda@unibas.ch](mailto:shinya.matsuda@unibas.ch)

### Summary

Morphogen gradients provide positional information and control growth in developing tissues, but the underlying mechanisms remain largely unknown due to lack of tools manipulating morphogen gradients. Here, we generate two synthetic protein binder tools manipulating different parameters of Decapentaplegic (Dpp), a morphogen thought to control *Drosophila* wing disc patterning and growth by dispersal; while HA trap blocks Dpp dispersal, Dpp trap blocks Dpp dispersal and signaling in the source cells. Using these tools, we found that while posterior patterning and growth require Dpp dispersal, anterior patterning and growth largely proceed without Dpp dispersal. We show that *dpp* transcriptional refinement from an initially uniform to a localized expression and persistent signaling in transient *dpp* source cells render the anterior compartment robust to blocking Dpp dispersal. Furthermore, neither Dpp dispersal nor signaling is critical for lateral wing growth. These results challenge Dpp dispersal-centric mechanisms, and demonstrate the utility of customized protein binder tools to dissect protein functions.

## 35 Introduction

36 A fundamental question in developmental biology is how proteins work together to orchestrate  
37 developmental processes. Forward and reverse genetic approaches based on mutants and RNAi,  
38 together with biochemical analyses, provide insights into how proteins function. However,  
39 interpretational gaps often remain between the mutant phenotypes and the underlying mechanisms.

40 Recently, small, high affinity protein binders such as nanobodies, single-chain variable  
41 fragment (scFv), Designed Ankyrin Repeat Proteins (DARPs) and others have emerged as versatile  
42 tools to fill this gap. By fusing these protein binders to well-characterized protein domains and  
43 expressing the fusion proteins *in vivo*, protein function can be directly manipulated in a predicted  
44 manner<sup>1-4</sup>. For example, to characterize a protein with multiple functions, these tools could allow to  
45 manipulate a given function without affecting others, thereby allowing a better dissection of each  
46 function. To investigate a protein function consisting of multiple parameters, applying different protein  
47 binder tools targeting each or a subset of parameters and comparing the effects with mutants could  
48 help to better dissect how a protein exerts its function. However, it remains challenging to design and  
49 customize distinct protein binder tools targeting different parameters to investigate protein functions  
50 consisting of multiple parameters.

51 A class of molecules that exert its function with multiple parameters are morphogens, secreted  
52 molecules that disperse from a localized source and regulate target gene expression in a concentration-  
53 dependent manner<sup>5-8</sup>. A morphogen gradient is characterized by its parameters such as secretion,  
54 diffusion, and degradation<sup>9</sup>. Temporal dynamics of a morphogen gradient also impact cell fates  
55 decisions<sup>10</sup>. Despite a variety of parameters involved, morphogen dispersal is generally thought to be  
56 critical for a morphogen function based on severe morphogen mutant phenotypes and long-range  
57 action of morphogens.

58 However, a recent study challenged this basic assumption for the case of the Wingless (Wg)  
59 morphogen, the main Wnt in *Drosophila*, by showing that a membrane-tethered non-diffusible form  
60 of Wg can replace the endogenous Wg without affecting appendages development<sup>11</sup>. Although the  
61 precise contribution of Wg dispersal requires further studies<sup>12-15</sup>, the study raises the question of how  
62 important morphogen dispersal is for tissue patterning and growth in general.

63 In contrast to Wg, *Decapentaplegic (dpp)*, the vertebrate BMP2/4 homologue, is thought to act  
64 as a *bona fide* morphogen in the *Drosophila* prospective wing. Dpp disperses bidirectionally from a  
65 narrow anterior stripe of cells along the anterior-posterior (A-P) compartment boundary to establish a  
66 characteristic morphogen gradient in both compartments<sup>16, 17</sup>. How the Dpp dispersal-mediated  
67 morphogen gradient achieves and coordinates overall wing patterning and growth has served as a  
68 paradigm to study morphogens<sup>18</sup>. However, despite intensive studies, it remains controversial how  
69 Dpp/BMP disperses<sup>16, 19-22</sup>, controls uniform growth<sup>23-29</sup>, and coordinates patterning and growth (i.e.  
70 scaling)<sup>30-33</sup>. Regardless of the actual mechanisms, all the studies are based on the assumption that  
71 bidirectional Dpp dispersal from the anterior stripe of cells controls overall wing patterning and growth,  
72 in line with the severe *dpp* mutant phenotypes.

73 To directly manipulate dispersal of Dpp, we recently generated a synthetic protein binder tool  
74 called morphotrap, a membrane-tethered anti-GFP nanobody, to trap GFP-tagged Dpp and thereby  
75 manipulating its dispersal<sup>34</sup>. Using morphotrap, we showed that a substantial amount of GFP-Dpp  
76 secreted from the anterior stripe of cells can reach to the peripheral wing disc and blocking GFP-Dpp  
77 dispersal from the source cells cause severe adult wing patterning and growth defects<sup>34</sup>. These results  
78 support the assumption that Dpp dispersal from the anterior stripe of cells is critical for overall wing  
79 patterning and growth (Fig. 1a)<sup>34</sup>. However, application of morphotrap was limited to rescue  
80 conditions by overexpression of GFP-Dpp due to the lack of an endogenous *GFP-dpp* allele.

81 Here, to investigate the precise requirement of endogenous Dpp morphogen gradient for wing  
82 patterning and growth, we first generated an endogenous *GFP-dpp* allele, but found that the allele was  
83 not fully functional, thus limiting morphotrap application. We then generated two synthetic protein  
84 binder tools analogous to morphotrap, manipulating distinct aspects of endogenous Dpp morphogen

85 gradient; while “HA trap” blocks functional Dpp dispersal, “Dpp trap” blocks Dpp dispersal and  
86 signaling in the source cells. Using these tools, we found that while Dpp signaling in the source cells  
87 is critical, the role of Dpp dispersal is surprisingly minor and asymmetric for wing patterning and  
88 growth; while posterior patterning and growth require Dpp dispersal, anterior patterning and growth  
89 largely proceed without Dpp dispersal. We show that previously unrecognized *dpp* transcriptional  
90 refinement from an initially uniform to a localized expression and persistent signaling in transient *dpp*  
91 source cells allow the anterior patterning and growth robust to blocking Dpp dispersal. Furthermore,  
92 we find that neither Dpp dispersal nor signaling is critical for the lateral wing pouch growth. These  
93 results challenge the long-standing dogma that Dpp dispersal is essential to control overall wing  
94 patterning and growth and call for a revision of how Dpp controls and coordinates wing patterning and  
95 growth.

96

## 97 **Results**

### 98 **A platform to manipulate the endogenous *dpp* locus**

99 To manipulate the endogenous Dpp morphogen gradient, we utilized a MiMIC transposon inserted in  
100 the *dpp* locus<sup>35</sup>. A genomic fragment containing sequences encoding a tagged version of *dpp* followed  
101 by an FRT and a marker was first inserted into the locus (Fig. 1b), then the endogenous *dpp* exon was  
102 removed upon FLP/FRT recombination to keep only the tagged *dpp* exon (Fig. 1b). Using this strategy,  
103 we inserted different tags into the *dpp* locus and found that while a *GFP-dpp* allele was homozygous  
104 lethal during early embryogenesis (data not shown), a *HA-dpp* allele was functional without obvious  
105 phenotypes (Fig. 1c). A similar functional HA tag knock-in *dpp* allele has recently been generated by  
106 a CRISPR approach<sup>29</sup>. HA-Dpp was expressed in the anterior stripe of cells along the A-P  
107 compartment boundary consistent with reported *dpp* expression pattern (Fig. 1d) and the extracellular  
108 HA-Dpp gradient overlapped with the gradient of phosphorylated Mad (pMad), a downstream  
109 transcription factor of Dpp signaling (Fig. 1e).

110

### 111 **Generation and characterization of HA trap**

112 Since we could not apply morphotrap due to the lethality of the *GFP-dpp* allele, we generated a protein  
113 binder tool called "HA trap" by fusing an anti-HA scFv to the transmembrane domain of CD8 and  
114 mCherry, analogous to morphotrap (Fig. 1f). To visualize Dpp upon trapping, we also generated a  
115 functional *Ollas-HA-dpp* allele. Upon HA trap expression using *ptc-Gal4* in an *Ollas-HA-dpp/+* wing  
116 disc, Ollas-HA-Dpp accumulated on the anterior stripe of cells, and the extracellular gradient was  
117 abolished (Fig. 1g-j). Furthermore, clonal accumulation of Ollas-HA-Dpp in HA trap clones in the  
118 receiving cells was undetectable upon HA trap expression with *ptc-Gal4* (Fig. 1k-n, arrow), indicating  
119 that the HA trap can block HA-Dpp dispersal efficiently like morphotrap. However, in contrast to  
120 morphotrap, Ollas-HA-Dpp accumulated in HA trap clones near the source but not in the peripheral  
121 regions (Fig. 1o arrowhead), raising the question whether Dpp can act in the peripheral regions.

122

### 123 **Blocking Dpp dispersal by HA trap causes minor and asymmetric patterning and growth defects**

124 To address the requirement of Dpp dispersal, we expressed HA trap using different *Gal4* driver lines  
125 in *HA-dpp* homozygous wing discs. Normally, Dpp binds to the Dpp receptors Thickveins (Tkv) and  
126 Punt, inducing a pMad gradient and an inverse gradient of Brk, a transcription repressor repressed by  
127 Dpp signaling. The two opposite gradients regulate patterning (nested target gene expression, such as  
128 *sal*, and *omb*) and growth to define adult wing vein positions and control growth<sup>18,36-39</sup> (Fig. 2a). Upon  
129 HA trap expression using *ptc-Gal4*, pMad, Sal, and Omb expression were completely lost and Brk was  
130 upregulated in the P compartment (Fig. 2b, e, f, g, h), indicating that HA trap efficiently blocked HA-  
131 Dpp dispersal. Interestingly, despite undetectable Dpp signaling, the posterior wing pouch grew  
132 substantially as judged by the expression of an intervein marker DSRF and a wing pouch marker  
133 *5xQE.DsRed* (a reporter of the Quadrant Enhancer (QE) of the wing master gene *vg*) (Fig. 2b arrow,  
134 2i). In the A compartment, pMad was slightly reduced in the anterior medial region (Fig. 2b, e),

135 probably because HA trap partially blocked Dpp signaling upon binding to HA-Dpp (Fig. 1n).  
136 Nevertheless, anterior patterning (nested expression of Sal and Omb) and growth were relatively  
137 normal (Fig. 2b). Consequently, the resulting adult wings showed relatively mild anterior and severe  
138 posterior patterning and growth defects with substantial posterior lateral growth (Fig. 2c, d). Slightly  
139 milder but similar phenotypes were observed upon HA trap expression using *nub-Gal4* (Fig. 2k-t) and  
140 *ci-Gal4* (Extended Data Fig. 2a-j). The severe posterior growth defects were not due to cell death,  
141 since Caspase-3 was not upregulated (Extended Data Fig. 1a, b, d), and blocking apoptosis by  
142 apoptosis inhibitor p35 did not rescue these growth defects (Extended Data Fig. 1e-g). These results  
143 suggest that, while critical for posterior patterning and growth, Dpp dispersal is largely dispensable  
144 for anterior patterning and growth, and that posterior lateral region can grow without Dpp dispersal  
145 and signaling.

146

### 147 **Lateral wing pouch growth without Dpp signaling**

148 Since Dpp dispersal- and signaling-independent posterior wing pouch growth contradicts previous  
149 reports<sup>40,41</sup>, we tested whether there was a substantial leakage of Dpp from the HA trap. When *tkv*<sup>a12</sup>  
150 clones characterized as a null allele<sup>42,43</sup> were induced in wing discs expressing HA trap with *ptc-Gal4*,  
151 *tkv*<sup>a12</sup> clones survived and expressed the *5xQE.DsRed* reporter in the anterior lateral regions as well as  
152 in the entire posterior region, even next to the source cells (Fig. 3a), indicating that leakage is  
153 negligible. Similarly, *tkv*<sup>a12</sup> clones induced in the wild type wing disc survived and expressed the  
154 *5xQE.DsRed* reporter in the lateral wing pouch (Fig. 3b). We also generated a *tkv* flip-out allele by  
155 inserting an FRT cassette in the *tkv* locus (*tkv*<sup>HA<sup>F0</sup>) and confirmed these results (Fig. 3c, d arrow). In  
156 rare cases, even medial *tkv* null clones survived and expressed *5xQE.DsRed* (Fig. 3d), indicating that  
157 the elimination of *tkv* mutant clones masked Dpp signaling-independent *5xQE.DsRed* expression in  
158 previous studies. Consistently, upon genetic removal of *dpp* from the entire A compartment as early  
159 as the beginning of second instar stage, when the wing pouch is defined, *5xQE.DsRed* remained  
160 expressed despite severe growth defects (Fig. 3e-h). Furthermore, the loss of *5xQE.DsRed* reporter  
161 expression in *dpp* mutants was rescued in *dpp*, *brk* double mutant wing discs (Extended Data Fig. 3).  
162 Taken together, these results indicate that lateral wing pouch can grow without direct Dpp signaling  
163 input after wing pouch specification.</sup>

164

### 165 **Blocking Dpp dispersal and signaling by Dpp trap causes severe defects similar to *dpp* mutant**

166 How can relatively normal patterning and growth be achieved without Dpp dispersal? Given the  
167 substantial pMad signal in the source cells upon HA trap expression (Fig. 2b, l), we hypothesized that  
168 Dpp signaling in the source cells could account for the minor phenotypes caused by HA trap. To test  
169 this, we avoided genetic removal of *tkv* since *tkv* affects Dpp dispersal non-autonomously<sup>44,45</sup>. Instead,  
170 we selected DARPins<sup>46</sup> against purified Dpp. For each of the 36 candidates from the screening, we  
171 generated a "Dpp trap" by fusing the anti-Dpp DARPIn to the transmembrane domain of CD8 and  
172 mCherry (Fig. 4a), and identified one Dpp trap (containing DARPIn 1242\_F1), which efficiently  
173 blocked Dpp dispersal and signaling (Fig. 4b, 4d, 4l, Extended Data Fig. 2k). We found that Dpp trap  
174 caused more severe defects than HA trap using *ptc-Gal4* (Fig. 4d, 2b), *nub-Gal4* (Fig. 4l, 4n, 2l, 2n),  
175 and *ci-Gal4* (Extended Data Fig. 2). Adult wings expressing Dpp trap using *nub-Gal4* were recovered  
176 and phenocopied severe *dpp* mutants (Fig. 4n, 3g, 3h). Interestingly, anterior Dpp trap expression  
177 caused more severe posterior growth defects as well as anterior growth defects than HA trap (Fig. 4j,  
178 Extended Data Fig. 2u). This non-autonomous effect was hardly seen by simply removing *tkv* from  
179 the entire A compartment, probably because Dpp can still disperse and control patterning and growth  
180 under this condition (data not shown). Since HA trap blocks Dpp dispersal more efficiently than Dpp  
181 trap (Extended Data Fig. 4), these severe phenotypes by Dpp trap is rather due to blocking Dpp  
182 signaling by Dpp trap. Although Caspase-3 was upregulated upon Dpp trap expression with *nub-Gal4*  
183 (Extended Data Fig. 1a, c, d), the growth defects were not rescued by p35 (Extended Data Fig. 1h-j),  
184 indicating that apoptosis was not the main cause of growth defects by Dpp trap. Taken together, these

185 results suggest that Dpp signaling in the source cells is required for anterior patterning and growth as  
186 well as for posterior growth seen upon blocking Dpp dispersal by HA trap.

187

### 188 **Rescue of *dpp* mutant by cell-autonomous Dpp signaling mimics phenotypes caused by HA trap**

189 To test whether cell-autonomous Dpp signaling is sufficient to control patterning and growth, a  
190 constitutively active version of Tkv (TkvQD)<sup>43</sup> was expressed in *dpp* mutants with *dpp-Gal4* (Fig. 5a,  
191 b). We found that, despite localized pMad activation in the anterior stripe of cells, anterior patterning  
192 and growth as well as part of posterior growth were largely restored, mimicking the phenotypes caused  
193 by HA trap (Fig. 2b, 5b). These results indicate that the phenotypes caused by HA trap largely depends  
194 on Dpp signaling in the source cells. How can local Dpp signaling in the source cells control patterning  
195 and growth extending beyond the anterior stripe of cells? First, we asked how anterior Dpp signaling  
196 can control posterior growth. One trivial possibility is that the posterior growth was induced by non-  
197 specific *dpp-Gal4* expression in the P compartment. To test this, *dpp-Gal4* was converted into a  
198 ubiquitous *LexA* driver, which was permanently expressed in lineages of *dpp-Gal4* to express TkvQD  
199 (Fig. 5c). We found that although pMad was upregulated only in the A compartment (Fig. 5d),  
200 *5xQE.DsRed* expression was induced in the P compartment (Fig. 5d arrow), indicating that non-  
201 autonomous posterior growth control by anterior Dpp signaling is permissive rather than instructive.

202

### 203 **Initial uniform *dpp* transcription in the anterior compartment**

204 Next, we asked how Dpp signaling in the source cells can control anterior patterning and growth (Fig.  
205 1d). It has been shown that the lineages of *dpp-Gal4* was uniform in the A compartment<sup>47</sup>. Consistently,  
206 the lineages of *dpp-Gal4* indicated by pMad signal was also uniform in the A compartment (Fig. 5d),  
207 raising the possibility that *dpp* expression is uniform in the early stages. Since the existing *dpp-Gal4*  
208 line is derived from a fragment of the *dpp* disc enhancer inserted outside the *dpp* locus, we first  
209 generated an endogenous *dpp-Gal4* line using our platform (Fig. 6a), and confirmed the uniform  
210 anterior lineages with G-TRACE analysis (Fig. 6b). To directly follow *dpp* transcription, we then  
211 generated a *dpp* transcription reporter line by inserting a destabilized GFP (half-life <2 hrs) into the  
212 *dpp* locus (Fig. 6c), and indeed found initial uniform anterior *dpp* transcription until the early third  
213 instar stage (Fig. 6d, e) prior to a narrow anterior stripe expression from the mid-third instar stage  
214 onwards (Fig. 6f, g).

215

### 216 **Transient *dpp* source outside Sal domain is required for anterior patterning and growth**

217 The earlier anterior *dpp* source outside the stripe of cells could provide a local *dpp* source to control  
218 anterior patterning and growth when Dpp dispersal is blocked. However, in such a scenario, since *ptc-*  
219 *Gal4* is also initially expressed in the entire A compartment<sup>48</sup>, the minor defects by HA trap could be  
220 explained by the perdurance of Dpp signaling via artificially stabilized Dpp by HA trap. To avoid such  
221 potential artificial effects, we expressed HA trap with *ptc-Gal4* at defined time points using *tubGal80ts*.  
222 Upon HA trap expression from the mid-second instar stage, the lineage of *ptc-Gal4* covered at most  
223 the anterior Sal domain, which corresponds to the region between L2 and L4 in the adult wing (Fig.  
224 7b). Nevertheless, the anterior peripheral regions remained rather normal (Extended Data Fig. 5),  
225 consistent with a role of the *dpp* source outside the Sal domain for patterning and/or growth.

226

227 To test this, *dpp* was genetically removed using *ptc-Gal4* approximately from the anterior Sal region,  
228 where cells in which the FRT cassette was removed were marked by lacZ staining (Fig. 7a-f).  
229 Consistent with the removal of the *dpp* stripe expression, pMad, Sal, and Omb were significantly  
230 reduced in the P compartment (Fig. 7d-f). In contrast, in the A compartment, low levels of pMad  
231 remained active and Brk was graded with lowest expression outside the Sal region (Fig. 7d). Under  
232 this condition, while Sal expression was completely lost, weak anterior Omb expression remained  
233 activated with highest signal in the lateral region (Fig. 7e, f). By removing *dpp* from the entire A  
234 compartment, this weak anterior Dpp signaling (pMad and Omb expression) as well as anterior growth

235 were severely affected (Fig. 7g-k), indicating that the transient *dpp* source outside the Sal domain  
236 contributes to anterior patterning and growth. Consistently, weak pMad and Omb expression remained  
237 rather normal in the anterior lateral region upon blocking Dpp dispersal by HA trap using *ptc-Gal4*  
238 (Fig. 2e, h). We then asked how the transient *dpp* source can lead to persistent Dpp signaling. Upon  
239 genetic removal of *tkv*, Brk was quickly de-repressed (Extended Data Fig. 6), indicating that the  
240 “memory” of an earlier signal is not mediated by epigenetic regulation or autoregulation of target gene  
241 expression but rather at the level of Tkv or upstream, consistent with weak but persistent pMad signal.  
242 The anterior patterning and growth can therefore be achieved without Dpp dispersal by a combination  
243 of a persistent signaling by transient *dpp* transcription outside the stripe and a stronger signaling by  
244 continuous *dpp* transcription in the anterior stripe of cells.

## 246 Discussion

247 Although protein binders have emerged as versatile tools to study protein functions, it remains  
248 challenging to design and customize distinct protein binder tools to dissect protein function. Here, we  
249 generate two novel protein binder tools to manipulate distinct parameters of the Dpp morphogen to  
250 precisely determine the requirement of Dpp dispersal and signaling in the source cells.

## 252 New protein binder tools manipulating distinct aspects of Dpp

253 Among protein binders against commonly used tags, nanobodies against GFP are used most  
254 intensively in the field<sup>49</sup>. However, since tagging with a large tag such as GFP could affect protein  
255 functions, as is the case for Dpp, protein binders against small tags have recently been generated to  
256 manipulate intracellular proteins<sup>50-53</sup>. Here, we show that HA trap works as efficient as morphotrap,  
257 providing an alternative way to trap secreted proteins via a small tag. Nevertheless, we found some  
258 differences between two traps. First, morphotrap appears leaky since trapping GFP-Dpp by  
259 morphotrap in the source activate Dpp signaling in at least one cell row in the P compartment<sup>34</sup>.  
260 Second, while morphotrap could accumulate GFP-Dpp even in the peripheral regions<sup>34</sup>, HA trap did  
261 not (Fig. 1n). Third, while morphotrap caused severe adult wing defects<sup>34</sup>, HA trap caused relatively  
262 minor defects (Fig. 2). We speculate that these differences are caused by overexpression of GFP-Dpp;  
263 persistent strong Dpp signaling could lead to cause cell death as shown previously<sup>24, 54-56</sup>. These  
264 differences highlight the importance of investigating endogenous protein functions.

266 In contrast to protein binders against commonly used tags, protein binders against endogenous proteins  
267 are rarely used due to the limited availability and difficulty in isolating them. Here, we screened  
268 DARPins against Dpp, and generated Dpp trap analogous to HA trap. Interestingly, we found that the  
269 two traps manipulate different parameters of Dpp morphogen gradient formation; while HA trap  
270 mainly blocks Dpp dispersal (Fig. 2), Dpp trap blocks Dpp dispersal and cell-autonomous signaling  
271 (Fig. 4). We speculate that HA trap binds to the HA tag, thereby allowing Dpp to bind to its receptors,  
272 while Dpp trap directly binds to Dpp to block its interaction with the receptors. Regardless of the actual  
273 mechanisms underlying this difference, these tools allow to dissect each requirement. Relatively mild  
274 phenotypes by HA trap and severe phenotypes by Dpp trap indicate a minor and asymmetric role of  
275 Dpp dispersal and a critical role of Dpp signaling in the source cells for wing patterning and growth,  
276 respectively. Furthermore, these results also suggest that, unlike previously thought, severe *dpp* mutant  
277 phenotypes do not reflect the role of Dpp dispersal alone, but reflect the role of both Dpp dispersal and  
278 signaling in the source cells, with more contribution from the latter parameter.

## 280 Asymmetric requirement of Dpp dispersal

281 It has long been thought that the bidirectional Dpp dispersal from the narrow anterior stripe of cells  
282 generate morphogen gradient in both compartments to control overall wing patterning and growth  
283 based on the critical requirement of *dpp* for wing development (Fig. 8a). A previous study using  
284 morphotrap also supported this view based on the severe adult wing defects upon morphotrap

285 expression<sup>34</sup>. Using HA trap and Dpp trap, we here show that the role of Dpp dispersal is surprisingly  
286 minor and asymmetric along the A-P axis; while posterior patterning and medial growth requires Dpp  
287 dispersal, anterior patterning and growth largely proceeds without Dpp dispersal (Fig. 2, 8b), although  
288 Dpp disperses bidirectionally from the anterior stripe of cells and generate a morphogen gradient in  
289 the late third instar stage (Fig. 1). Based on the similar rescue of *dpp* mutants by TkvQD (Fig. 5), it  
290 has been proposed that both Sal and Omb expression are initially induced in the anterior stripe of cells,  
291 but only Omb expression persists in lineages of these cells via proliferation, generating nested  
292 expression of Omb and Sal<sup>44</sup>. In contrast, we show that all the anterior cells are initially a *dpp* source  
293 (Fig. 6). Interestingly, a *dpp* source outside the anterior stripe of cells has previously been implicated  
294 to control the growth of the entire wing pouch<sup>23</sup>, although such a *dpp* source has not been identified  
295 and its existence has been questioned<sup>29, 48, 57</sup>. We identified such a *dpp* source contributing to anterior  
296 patterning and growth together with the main *dpp* stripe; however, this source does not control growth  
297 of the entire wing pouch (Fig. 6, 7).

298  
299 The non-essential requirement of Dpp dispersal for the anterior compartment is reminiscent of the  
300 minor requirement of dispersal of Wg, a morphogen required for wing patterning and growth along  
301 the dorsal-ventral axis<sup>11</sup>. It has been shown that a membrane-tethered form of Wg can replace the  
302 endogenous Wg without affecting wing patterning and growth<sup>11</sup>. Although the precise requirement of  
303 Wg dispersal requires further studies<sup>14</sup>, in both cases, transcriptional refinement of each morphogen  
304 and persistent signaling by transient morphogen expression allow anterior compartment robust to  
305 blocking morphogen dispersal. However, while the *wg* allele encoding a membrane-tethered form is  
306 homozygous viable without major phenotypes, ubiquitous blocking of Dpp dispersal by HA trap  
307 during development caused lethality (data not shown), indicating a critical role of Dpp dispersal during  
308 development. Future studies should reveal the precise role of Dpp dispersal in other developmental  
309 processes.

### 310 311 **Growth without Dpp dispersal and signaling**

312 Our results also uncover Dpp dispersal- and signaling-independent lateral wing pouch growth once the  
313 wing pouch is specified (Fig. 2, 3, 5). How can this be reconciled with the complete loss of wing pouch  
314 in classic *dpp* disc alleles (Fig. 5, Extended Data Fig. 3)? The severe phenotypes of *dpp* disc alleles  
315 could be due to a failure of the initial specification of the wing pouch<sup>58</sup>. However, the rescue of  
316 posterior wing pouch growth in *dpp* mutants by anterior Dpp signaling (Fig. 5) suggests that posterior  
317 lateral wing pouch cells can grow without local Dpp signaling upon anterior Dpp signaling activation.  
318 Consistently, despite severe growth defects, *5xQE-DsRed* remained expressed in the P compartment  
319 upon genetic removal of *tkv* from the entire P compartment from embryonic stages (Extended Data  
320 Fig. 7). The non-autonomous posterior growth induction by anterior Dpp signal is not likely caused  
321 by juxtaposition of cells with different Dpp signaling level<sup>26</sup>. We thus speculate that, despite a failure  
322 of initial wing pouch specification, the posterior lateral wing pouch has the potential to grow but fails  
323 to do so in *dpp* disc alleles due to the loss of earlier anterior Dpp signaling. Our results can also explain  
324 the previous enigmatic observation that lateral wing fates are less sensitive than medial wing fates in  
325 some weak *dpp* mutant alleles<sup>59</sup>. We speculate that in these alleles, *dpp* levels are reduced to a level  
326 at which Dpp cannot disperse enough to control posterior patterning and growth but can still activate  
327 weak anterior Dpp signaling sufficient to sustain posterior growth.

328  
329 The presence of Dpp signaling-independent lateral wing pouch growth is unexpected and at odds with  
330 all the growth models based on the assumption that Dpp controls overall wing patterning and growth  
331<sup>23-29</sup>. For example, no wing pouch growth is expected without Dpp signaling due to a lack of either a  
332 temporal increase of Dpp signaling (temporal model)<sup>60</sup>, a detectable Dpp signal (threshold model)<sup>29,</sup>  
333<sup>57, 61</sup>, or a slope of Dpp signaling activity (gradient model)<sup>24, 25</sup>. Among the models, the best fit model  
334 to our observation is the growth equalization model, in which Dpp signaling removes Brk to allow

335 medial regions to grow, while Brk represses Dpp signaling-independent lateral growth with higher  
336 proliferation nature to equalize the non-uniform growth<sup>26, 27</sup>. However, the identity of medial and  
337 lateral regions remained undefined in this model. A previous study using morphotrap also identified  
338 such a Dpp signaling-insensitive region, but assigned this region to the hinge region due to the severe  
339 adult wing growth defects by morphotrap expression<sup>34</sup>. We thus refine the growth equalization model  
340 and propose that both medial and lateral regions are located within the wing pouch (Fig. 8b).  
341 Consistently, overgrowth phenotypes in *brk* mutant were observed in the wing pouch region rather  
342 than in the hinge region (Extended Data Fig. 3). The permissive role of Dpp in modulating a non-  
343 uniform growth potential within the wing pouch raises questions about what kind of instructive signals  
344 control proliferation and growth, how the non-uniform growth potential emerges independent of  
345 Dpp/Brk system<sup>39</sup>, as well as how the scaling of patterning with tissue size is achieved.

346

### 347 **Conclusion**

348 In developmental biology, interpretational gaps often remain between the mutant phenotypes and the  
349 underlying molecular mechanisms. Our approach applying customized protein binder tools to  
350 manipulate distinct parameters of Dpp challenges the long-standing dogma that Dpp dispersal controls  
351 overall wing patterning and growth, which was not possible by simple mutant analyses, thus  
352 demonstrating the utility of the approach to better dissect protein functions during development.



## 353 Experimental procedures

### 354 Data reporting

355 No statistical methods were used to predetermine sample size. The experiments were not randomized,  
356 and investigators were not blinded to allocation during experiments and outcome assessment.

### 357 Fly stocks

358 Flies were kept in standard fly vials (containing polenta and yeast) in a 25°C incubator. The following  
359 fly lines were used: *dpp<sup>FO</sup>*, *dpp-Gal4*, *UAS-FLP* (Matthew Gibson), *ptc-Gal4* (BL2017),  
360 *P{act5C(FRT.polyA)lacZ.nls1}3*, *ry506* (BL6355), *w[\*]*; *P{w[+mC]=UAS-RedStinger}6*,  
361 *P{w[+mC]=UAS-FLP.Exel}3*, *P{w[+mC]=Ubi-p63E(FRT.STOP)Stinger}15F2* (G-  
362 TRACE)(BL28281), *brk<sup>XA</sup>* (BL58792), *dpp<sup>M103752</sup>* (BL36399), *PBac{RB}e00178*, *Dp(2;2)DTD48*  
363 (Bloomington stock center). *omb-LacZ* (Kyoto101157). *act>Stop*, *y+>LexA<sup>LHG</sup>*, *tkv<sup>a12</sup>*, *UAS-TkvQD*,  
364 *pLexAop-TkvQD* (Konrad Basler), *5xQE.DsRed* (Gary Struhl), *UAS/LexAop-HAtrap* (this study),  
365 *UAS/LexAop-Dpp trap* (F1) (this study), *dpp<sup>d8</sup>*, *dpp<sup>d12</sup>*, *nub-Gal4* (II), *ci-Gal4* (II), *hh-Gal4* (III), *UAS-*  
366 *p35*(III), *tub-Gal80ts* (III) are described from Flybase. *tub>CD2*, *Stop>Gal4*, *UAS-nlacZ* (Francesca  
367 Pignoni). *TkvHA* (Giorgos Pyrowolakis).

368

### 369 Genotypes by figures

370 Fig. 1c-e: *yw*; *HA-dpp/HA-dpp*

371 Fig. 1g: *yw*; *ptc-Gal4*, *Ollas-HA-dpp/+*

372 Fig. 1i: *yw*; *ptc-Gal4*, *Ollas-HA-dpp/+*; *UAS/LexAop-HAtrap/+*

373 Fig. 1k: *hsFLP*; *Ollas-HA-dpp/tub>CD2*, *Stop>Gal4*, *UAS-nlacZ*; *UAS/LexAop-HAtrap/+*

374 Fig. 1m: *hsFLP*; *ptc-Gal4*, *Ollas-HA-dpp/tub>CD2*, *Stop>Gal4*, *UAS-nlacZ*; *UAS/LexAop-HAtrap/+*

375 Fig. 1o: *hsFLP*; *Ollas-HA-dpp/tub>CD2*, *Stop>Gal4*, *UAS-nlacZ*; *UAS/LexAop-HAtrap/+*

376 Fig. 2a, c: (*5xQE.DsRed*); *ptc-Gal4*, *HA-dpp/HA-dpp*

377 Fig. 2b, d: (*5xQE.DsRed*); *ptc-Gal4*, *HA-dpp/HA-dpp*; *UAS/LexAop-HAtrap/+*

378 Fig. 2k, m: *yw*; *nub-Gal4*, *HA-dpp/HA-dpp*

379 Fig. 2l, n: *yw*; *nub-Gal4*, *HA-dpp/HA-dpp*; *UAS/LexAop-HAtrap/+*

380 Fig. 3a: *hsFLP/5xQE.DsRed*; *HA-dpp*, *tkv<sup>a12</sup> FRT40/HA-Dpp*, *UbiGFP*, *FRT40*, *ptc-Gal4*;  
381 *UAS/LexAop-HAtrap/+*

382 Fig. 3b: *hsFLP/5xQE.DsRed*; *tkv<sup>a12</sup> FRT40/UbiGFP*, *FRT40*

383 Fig. 3c, D: *hsFLP/5xQE.DsRed*; *tkvHA<sup>FO</sup>/tkvHA<sup>FO</sup>*

384 Fig. 3e, f: (internal control within a cross) *5xQE.DsRed/+*; (*dpp<sup>FO</sup>*, *ci-Gal4*)/(*dpp<sup>FO</sup>*); (*UAS-*  
385 *FLP*)/*tubGal80ts*,

386 Fig. 3g, h: *5xQE.DsRed/+*; *dpp<sup>FO</sup>*, *ci-Gal4/dpp<sup>FO</sup>*; *UAS-FLP/tubGal80ts*,

387 Fig. 4b: (left) *yw*; *ptc-Gal4*, *Ollas-HA-dpp/+*, (right) *yw*; *ptc-Gal4*, *Ollas-HA-dpp/+*; *UAS/LexAop-*  
388 *Dpptrap/+*

389 Fig. 4c: *yw*; *ptc-Gal4*, *HA-dpp/+*

390 Fig. 4d: *yw*; *ptc-Gal4*, *HA-dpp/+*; *UAS/LexAop-Dpptrap/+*

391 Fig. 4k, m: *yw*; *nub-Gal4*, *HA-dpp/+*

392 Fig. 4l, n: *yw*; *nub-Gal4*, *HA-dpp/+*; *UAS/LexAop-Dpptrap/+*

393 Fig. 5a: (*y*)*w*; *dpp<sup>d8</sup>/dpp<sup>d12</sup>*

394 Fig. 5b: (*y*)*w*; *dpp<sup>d8</sup>/dpp<sup>d12</sup>*; *dpp-Gal4/UAS-tkvQD*

395 Fig. 5d: *dpp<sup>d8</sup>*, *UAS-FLP/dpp<sup>d12</sup>*, *act>Stop*, *y+>LexA<sup>LHG</sup>*; *dpp-Gal4/LexAop-tkvQD* and  
396 *5xQE.DsRed/+*; *dpp<sup>d8</sup>*, *UAS-FLP/dpp<sup>d12</sup>*, *act>Stop*, *y+>LexA<sup>LHG</sup>*; *dpp-Gal4/LexAop-tkvQD*,

397 Fig. 6b: *yw*; *dpp-T2A-Gal4*, *Dp(2;2)DTD48(dpp+)*; *P{w[+mC]=UAS-RedStinger}6*,

398 *P{w[+mC]=UAS-FLP.Exel}3*, *P{w[+mC]=Ubi-p63E(FRT.STOP)Stinger}15F2/+*

399 Fig. 6d-g: *yw M{vas-int.Dm}zh-2A*; *dpp-T2A-d2GFP-NLS/Cyo*, *P23*

400 Fig. 7a-c: *ptc-Gal4*, *dpp<sup>FO</sup>/+*; *tubGal80ts/UAS-FLP*, *act5C(FRT.polyA)lacZ.nls*

401 Fig. 7d-h: *ptc-Gal4, dpp<sup>FO</sup>/dpp<sup>FO</sup>; tubGal80ts/UAS-FLP, act5C(FRT.polyA)lacZ.nls*  
402 Fig. 7i-j: *ci-Gal4, dpp<sup>FO</sup>/dpp<sup>FO</sup>; tubGal80ts/UAS-FLP, act5C(FRT.polyA)lacZ.nls*  
403 Extended Data Fig. 1a: *ptc-Gal4, HA-dpp/HA-dpp*  
404 Extended Data Fig. 1b: *ptc-Gal4, HA-dpp/HA-dpp; UAS/LexAop-HAtrap/+*  
405 Extended Data Fig. 1c: *nub-Gal4, HA-dpp/+; UAS/LexAop-Dpptrap/+*,  
406 Extended Data Fig. 1e: *nub-Gal4, HA-dpp/HA-dpp; UAS/LexAop-HAtrap/+*,  
407 Extended Data Fig. 1f: *nub-Gal4, HA-dpp/HA-dpp; UAS/LexAop-HAtrap/UAS-p35*,  
408 Extended Data Fig. 1h: *nub-Gal4, HA-dpp/+; UAS/LexAop-Dpptrap/+*  
409 Extended Data Fig. 1i: *nub-Gal4, HA-dpp/+; UAS/LexAop-Dpptrap/UAS-p35*, Fig. S3: *nub-Gal4, ptc-*  
410 *Gal4, HA-dpp/HA-dpp, nub-Gal4, ptc-Gal4, HA-dpp/HA-dpp; UAS/LexAop-HAtrap/+*  
411 Extended Data Fig. 2a, c, e, g, i: *HA-dpp/HA-dpp, ci>+* (left) and *HA-dpp/HA-dpp, ci>HA trap* (right)  
412 Extended Data Fig. 2k, m, o, q, s: *HA-dpp/+*, *ci>+* (left) and *HA-dpp/+*, *ci>Dpp trap* (right)  
413 Extended Data Fig. 3a: *5xQE.DsRed/+*, *dpp<sup>d8</sup> or dpp<sup>d12</sup>/+*  
414 Extended Data Fig. 3b: *5xQE.DsRed/+; dpp<sup>d8</sup>/dpp<sup>d12</sup>*  
415 Extended Data Fig. 3c: *5xQE.DsRed, brk<sup>XA</sup>/Y, dpp<sup>d8</sup> or dpp<sup>d12</sup>/+*  
416 Extended Data Fig. 3d: *5xQE.DsRed, brk<sup>XA</sup>/Y, dpp<sup>d8</sup>/dpp<sup>d12</sup>*  
417 Extended Data Fig. 4: (control) *ptc-Gal4, HA-dpp/+*, (Dpptrap) *ptc-Gal4, HA-dpp/+; UAS/LexAop-*  
418 *Dpptrap/+*, (HAtrap) *ptc-Gal4, HA-dpp/HA-dpp; UAS/LexAop-HAtrap/+*  
419 Extended Data Fig. 5: (control) *ptc-Gal4, HA-dpp/HA-dpp; tubGal80ts/+*, (experiment) *ptc-Gal4, HA-*  
420 *dpp/HA-dpp; UAS/LexAop-HAtrap/tubGal80ts*  
421 Extended Data Fig. 6: *tkvHA<sup>FO</sup>, ci-Gal4/tkvHA<sup>FO</sup>; UAS-FLP/tubGal80ts*  
422 Extended Data Fig. 7: (control within the cross) *5xQE.DsRed/+; (tkvHA<sup>FO</sup>)/tkvHA<sup>FO</sup>; (Hh-Gal4)/+*  
423 (experiment) *5xQE.DsRed/+; tkvHA<sup>FO</sup>/tkvHA<sup>FO</sup>; Hh-Gal4/UAS-FLP*

424

## 425 Immunostainings and antibodies

426 Protocol as described previously<sup>34</sup>. Each fly cross was set up together with a proper control and  
427 genotypes were processed in parallel. If the genotype could be distinguished, experimental and control  
428 samples were processed in the same tube. To minimize variations, embryos were staged by collecting  
429 eggs for 2-4hrs. An average intensity image from 3 sequential images from a representative wing disc  
430 is shown for all the experiments. The following primary antibodies were used; anti-HA (3F10, Roche;  
431 1:300 for conventional staining, 1:20 for extracellular staining), anti-Ollas (Novus Biologicals, 1:300  
432 for conventional staining, 1:20 for extracellular staining), anti-phospho-Smad1/5 (1:200; Cell  
433 Signaling), anti-Brk (1:1.000; Gines Morata), anti-Sal (1:500; Rosa Barrio), anti-Omb (1:500; Gert  
434 Pflugfelder), anti-Wg (1:120; DSHB, University of Iowa), anti-Ptc (1:40; DSHB, University of Iowa),  
435 anti-β-Galactosidase (1:1.000; Promega, 1:1000; abcam). All the primary and secondary antibodies  
436 were diluted in 5% normal goat serum (NGS) (Sigma) in PBT (0.03% Triton X-100/PBS). All  
437 secondary antibodies from the AlexaFluor series were used at 1:500 dilutions. Wing discs were  
438 mounted in Vectashield (H-1000, Vector Laboratories). Images of wing discs were obtained using a  
439 Leica TCS SP5 confocal microscope (section thickness 1 μm).

440

## 441 Quantification

### 442 Quantification of pMad, Brk, Sal, and Omb

443 From each z-stack image, signal intensity profile along A/P axis was extracted from average projection  
444 of 3 sequential images using ImageJ. Each signal intensity profile was aligned along A/P compartment  
445 boundary (based on anti-Ptc staining) and average signal intensity profile from different samples was  
446 generated and plotted by the script (wing\_disc-alignment.py). The average intensity profile from  
447 control and experimental samples were then compared by the script (wingdisc\_comparison.py). Both  
448 scripts can be obtained from ([https://etiennes.github.io/Wing\\_disc-alignment/](https://etiennes.github.io/Wing_disc-alignment/)). The resulting signal  
449 intensity profiles (mean with SD) were generated by Prism.

#### 450 Quantification of wing pouch size and adult wing size

451 The A and P compartment of the wing pouches were approximated by Ptc/Wg staining and positions  
452 of folds, and the A/P compartment boundary of the adult wings were approximated by L4 position.  
453 The size of each compartment was measured using ImageJ. Scatter dot plots (mean with SD) were  
454 generated by Prism.

#### 455 Statistics

456 Statistical significance was assessed by Prism based on the normality tests using a two-sided Mann-  
457 Whitney test (Fig. 2t, for P compartment, Fig. 4s, for A compartment, Fig. 4u, for A compartment)  
458 and a two-sided Student's *t*-test with unequal variance for the rest of the comparisons (\*\*\*)  
459 \*\*\*\*  $p < 0.0001$ ).

#### 461 **Generation of *HA-dpp* and *GFP-dpp* knock-in allele**

##### 462 Cloning of plasmids for injection.

463 A fragment containing multi-cloning sites (MCS) between two inverted attB sites was synthesized and  
464 inserted in the pBS (BamHI) vector (from Mario Metzler). A genomic fragment of *dpp* between  
465 *dpp*<sup>M103752</sup> and *PBac{RB}e00178* (about 4.4kb), as well as an *FRT* and *3xP3mCherry* were inserted in  
466 this MCS by standard cloning procedures. A fragment encoding HA tag or GFP was inserted between  
467 the XhoI and NheI sites inserted after the last Furin processing site<sup>17</sup>.

##### 468 Inserting *dpp* genomic fragments in the *dpp* locus

469 The resulting plasmids were injected in *yw M{vas-int.Dm}zh-2A; dpp*<sup>M103752</sup>/*Cyo, P23*. *P23* is a  
470 transgene containing a *dpp* genomic fragment to rescue *dpp* haploinsufficiency. After the hatched flies  
471 were backcrossed, flies that lost *y* inserted between inverted attP sites in the mimic transposon lines  
472 were individually backcrossed to establish stocks. The orientation of inserted fragments was  
473 determined by PCR.

##### 474 Removal of the endogenous *dpp* exon by FLP/FRT recombination

475 Males from the above stock were crossed with females of genotype *hsFLP; al, PBac{RB}e00178/SM6*,  
476 *al, sp* and subjected to heat-shock at 37°C for 1hr/day. *PBac{RB}e00178* contains *FRT* sequence and  
477 *w+* and upon recombination, the *dppHA* genomic fragment are followed by *FRT* and *w+*. Hatched  
478 males of *hsFLP;dppHA/al,PBac{RB}e00178* were crossed with *yw; al, b, c, sp/ SM6, al, sp*. From this  
479 cross, flies *yw; dppHA(w+)/SM6, al, sp* were individually crossed with *yw; al, b, c, sp/ SM6, al, sp* to  
480 establish the stock.

481

#### 482 **Construction of $\alpha$ -HAscFv**

483 cDNA of HAscFv was constructed by combining coding sequences of variable regions of the heavy  
484 chain (V<sub>H</sub>: 1-423 of LC522514) and of the light chain (V<sub>L</sub>: 67-420 of LC522515) cloned from anti-  
485 HA hybridoma (clone 12CA5<sup>62</sup>) with a linker sequence (5'-  
486 accggtGGCGGAGGCTCTGGCGGAGGAGGTTCCGGCGGAGGTGGAAGCgatac-3') in the order  
487 of V<sub>H</sub>-linker-V<sub>L</sub>. The coding sequence of HAscFv was cloned into pCS2+mcs-2FT-T for FLAG-  
488 tagging. Requests for HAscFv should be addressed to YM ([mii@nibb.ac.jp](mailto:mii@nibb.ac.jp)). To generate HA trap, the  
489 region encoding morphotrap (VHH-GFP4) was replaced with KpnI and SphI sites in pLOTattB-VHH-  
490 GFP4:CD8-mChery<sup>34</sup>. A fragment encoding HAscFv was amplified by PCR and then inserted via  
491 KpnI and SphI sites by standard cloning procedures.

492

#### 493 **Selection of Dpp-binding DARPins and generation of Dpp trap**

494 Streptavidin-binding peptide (SBP)-tagged mature C-terminal domain of Dpp was cloned into  
495 pRSFDuet vector by a standard cloning. Dpp was overexpressed in *E. coli*, extracted from inclusion  
496 bodies, refolded, and purified by heparin affinity chromatography followed by reverse phase HPLC<sup>63</sup>.  
497 To isolate suitable DARPins, SBP-tagged Dpp was immobilized on streptavidin magnetic beads and  
498 used as a target for DARPins selections by employing multiple rounds of Ribosome Display<sup>64,65</sup>. Due

499 to the aggregation and precipitation propensity of the purified SBP-Dpp, the refolded dimers  
500 previously stored in 6 M urea buffer (6 M urea, 50 mM Tris-HCl, 2 mM EDTA pH8.0, 0.25 M NaCl)  
501 were diluted to a concentration of 100-120 µg/ml in the same buffer and subsequently dialyzed against  
502 4 mM HCl at 4°C overnight. To ensure binding of correctly folded Dpp to the beads, this solution was  
503 diluted five times in the used selection buffer just prior to bead loading and the start of the ribosome  
504 display selection. In each panning round, the target concentration presented on magnetic beads was  
505 reduced, while the washing stringency was simultaneously increased to enrich for binders with high  
506 affinities<sup>65</sup>. In addition, from the second round onward, a pre-panning against Streptavidin beads was  
507 performed prior to the real selection to reduce the amounts of matrix binders. After four rounds of  
508 selection, the enriched pool was cloned into an *E. coli* expression vector, enabling the production of  
509 both N-terminally His<sub>8</sub>- and C-terminally FLAG-tagged DARPins. Nearly 400 colonies of transformed  
510 *E. coli* were picked and the encoded binders expressed in small scale. Bacterial crude extracts were  
511 subsequently used in enzyme-linked immunosorbent assay (ELISA) screenings, detecting the binding  
512 of candidate DARPins to streptavidin-immobilized Dpp, or just streptavidin (indicating background  
513 binding) by using a FLAG-tag based detection system (data not shown). Of those 127 candidate  
514 DARPins interacting with streptavidin-immobilized Dpp, 73 (or 57%) specifically bound to Dpp (i.e.,  
515 having at least threefold higher signal for streptavidin-immobilized Dpp than to streptavidin alone).  
516 36 of these (50%) revealed unique and full-length sequences. To generate Dpp trap, the region  
517 encoding morphotrap (VHH-GFP4) was replaced with KpnI and SphI sites in pLOTattB-VHH-  
518 GFP4:CD8-mChery<sup>34</sup>. Each fragment encoding a DARPIn was amplified by PCR and then inserted  
519 via KpnI and SphI sites by standard cloning procedures.

520

#### 521 **Generation of *tkvHA<sup>FO</sup>* (Flip-out) allele**

522 The *tkvHA* allele was previously described<sup>66</sup>. An FRT cassette was inserted in the re-insertion vector  
523 for *tkvHA* (Genewiz) and re-inserted into the attP site in the *tkv* locus.

524

#### 525 **Generation of endogenous *dpp-Gal4***

526 *pBS-KS-attB2-SA(1)-T2A-Gal4-Hsp70* (addgene 62897) was injected in the *yw M{vas-int.Dm}zh-2A*;  
527 *dpp<sup>MI03752</sup>/Cyo*, *P23* stock. Since the *Gal4* insertion causes haploinsufficiency, the *dpp-Gal4* was  
528 recombined with *Dp(2;2)DTD48* (duplication of *dpp*) for G-TRACE analysis.

529

#### 530 **Generation of an endogenous *dpp* reporter**

531 A DNA fragment containing T2A-d2GFP-NLS was synthesized and used to replace the region  
532 containing *T2A-Gal4* in *pBS-KS-attB2-SA(1)-T2A-Gal4-Hsp70* via BamHI to generate *pBS-KS-attB2-*  
533 *SA(1)-T2A-d2GFP-NLS-Hsp70* (Genewiz). The resulting plasmid was injected in the *yw M{vas-*  
534 *int.Dm}zh-2A*; *dpp<sup>MI03752</sup>/Cyo*, *P23* stock.

535

536

537 **Acknowledgments:**

538 We thank Konrad Basler, Giorgos Pyrowolakis, Gustavo Aguilar, and Sheida Hadji Rasouliha for  
539 comments on the manuscript. Stocks obtained from the Bloomington Drosophila Stock Center (NIH  
540 P40OD018537) were used in this study. We thank Konrad Basler, Gary Struhl, Matthew Gibson,  
541 Giorgos Pyrowolakis, and Kyoto stock center for flies. We thank Gines Morata, Rosa Barrio, Gert  
542 Pflugfelder, and the Developmental Studies Hybridoma Bank at The University of Iowa for antibodies.  
543 We thank the Biozentrum Imaging Core Facility for maintenance of microscopes and support. We  
544 thank Etienne Schmelzer for scripts for quantification and Oguz Kanca for the idea to manipulate *dpp*  
545 locus. We would like to thank Bernadette Bruno, Gina Evora and Karin Mauro for constant and reliable  
546 supply with world's best fly food. We further acknowledge all current and former members of the  
547 High-Throughput Binder Selection facility at the Department of Biochemistry of the University of  
548 Zurich for their contribution to the establishment of the semi-automated ribosome display that resulted  
549 in the generation of the used anti-Dpp DARPins binders, particularly Thomas Reinberg. **Funding:** SM  
550 has been supported by a JSPS Postdoctoral Fellowship for Research Abroad and the Research Fund  
551 Junior Researchers University of Basel, and is currently supported by a SNSF Ambizione grant  
552 (PZ00P3\_180019). YM has been supported by JST PRESTO (JPMJPR194B) and JSPS KAKENHI  
553 (18K14720). The work in the Affolter laboratory was supported by grants from Kantons Basel-Stadt  
554 and Basel-Land and from the SNSF (MA).

555

556 **Author contributions:** This project was conceived by SM and MA. SM designed, performed, and  
557 analyzed all the experiments. JVS and AP isolated DARPins against Dpp. YM, YH, and MT cloned  
558  $\alpha$ -HA scFv. DB helped with Dpp purification. The main text was written by SM and MA with  
559 comments from all the authors.

560

561 **Competing interests:** Authors declare no competing interests.

562

563

564  
565  
566  
567  
568  
569  
570  
571  
572  
573  
574  
575  
576  
577  
578  
579  
580  
581  
582  
583  
584  
585  
586  
587  
588  
589  
590  
591  
592  
593  
594  
595  
596  
597  
598  
599  
600  
601  
602  
603  
604  
605  
606  
607  
608  
609  
610  
611  
612  
613

## References

1. Helma, J., Cardoso, M. C., Muyltermans, S. & Leonhardt, H. Nanobodies and recombinant binders in cell biology. *J. Cell Biol.* **209**, 633-644 (2015).
2. Harmansa, S. & Affolter, M. Protein binders and their applications in developmental biology. *Development* **145**, 10.1242/dev.148874 (2018).
3. Bieli, D. *et al.* Development and Application of Functionalized Protein Binders in Multicellular Organisms. *Int. Rev. Cell. Mol. Biol.* **325**, 181-213 (2016).
4. Kaiser, P. D., Maier, J., Traenkle, B., Emele, F. & Rothbauer, U. Recent progress in generating intracellular functional antibody fragments to target and trace cellular components in living cells. *Biochim. Biophys. Acta* **1844**, 1933-1942 (2014).
5. Turing, A. The chemical basis of morphogenesis. *Philosophical Transactions of the Royal Society of London B* **237** (1952).
6. Tabata, T. Genetics of morphogen gradients. *Nat. Rev. Genet.* **2**, 620-630 (2001).
7. Ashe, H. L. & Briscoe, J. The interpretation of morphogen gradients. *Development* **133**, 385-394 (2006).
8. Rogers, K. W. & Schier, A. F. Morphogen gradients: from generation to interpretation. *Annu. Rev. Cell Dev. Biol.* **27**, 377-407 (2011).
9. Kicheva, A., Bollenbach, T., Wartlick, O., Julicher, F. & Gonzalez-Gaitan, M. Investigating the principles of morphogen gradient formation: from tissues to cells. *Curr. Opin. Genet. Dev.* **22**, 527-532 (2012).
10. Sagner, A. & Briscoe, J. Morphogen interpretation: concentration, time, competence, and signaling dynamics. *Wiley Interdiscip. Rev. Dev. Biol.* **6**, 10.1002/wdev.271. Epub 2017 Mar 20 (2017).
11. Alexandre, C., Baena-Lopez, A. & Vincent, J. P. Patterning and growth control by membrane-tethered Wingless. *Nature* **505**, 180-185 (2014).
12. Tian, A., Duwadi, D., Benchabane, H. & Ahmed, Y. Essential long-range action of Wingless/Wnt in adult intestinal compartmentalization. *PLoS Genet.* **15**, e1008111 (2019).
13. Apitz, H. & Salecker, I. Spatio-temporal relays control layer identity of direction-selective neuron subtypes in *Drosophila*. *Nat. Commun.* **9**, 2295-018-04592-z (2018).
14. Chaudhary, V. *et al.* Robust Wnt signaling is maintained by a Wg protein gradient and Fz2 receptor activity in the developing *Drosophila* wing. *Development* **146**, 10.1242/dev.174789 (2019).
15. Resino, J., Salama-Cohen, P. & Garcia-Bellido, A. Determining the role of patterned cell proliferation in the shape and size of the *Drosophila* wing. *Proc. Natl. Acad. Sci. U. S. A.* **99**, 7502-7507 (2002).
16. Entchev, E. V., Schwabedissen, A. & Gonzalez-Gaitan, M. Gradient formation of the TGF-beta homolog Dpp. *Cell* **103**, 981-991 (2000).
17. Teleman, A. A. & Cohen, S. M. Dpp gradient formation in the *Drosophila* wing imaginal disc. *Cell* **103**, 971-980 (2000).
18. Affolter, M. & Basler, K. The Decapentaplegic morphogen gradient: from pattern formation to growth regulation. *Nat. Rev. Genet.* **8**, 663-674 (2007).
19. Zhou, S. *et al.* Free extracellular diffusion creates the Dpp morphogen gradient of the *Drosophila* wing disc. *Curr. Biol.* **22**, 668-675 (2012).
20. Belenkaya, T. Y. *et al.* *Drosophila* Dpp morphogen movement is independent of dynamin-mediated endocytosis but regulated by the glypican members of heparan sulfate proteoglycans. *Cell* **119**, 231-244 (2004).
21. Schwank, G. *et al.* Formation of the long range Dpp morphogen gradient. *PLoS Biol.* **9**, e1001111 (2011).
22. Hsiung, F., Ramirez-Weber, F. A., Iwaki, D. D. & Kornberg, T. B. Dependence of *Drosophila* wing imaginal disc cytonemes on Decapentaplegic. *Nature* **437**, 560-563 (2005).

- 614 23. Akiyama, T. & Gibson, M. C. Decapentaplegic and growth control in the developing *Drosophila*  
615 wing. *Nature* **527**, 375-378 (2015).
- 616 24. Rogulja, D. & Irvine, K. D. Regulation of cell proliferation by a morphogen gradient. *Cell* **123**,  
617 449-461 (2005).
- 618 25. Rogulja, D., Rauskolb, C. & Irvine, K. D. Morphogen control of wing growth through the Fat  
619 signaling pathway. *Dev. Cell.* **15**, 309-321 (2008).
- 620 26. Schwank, G., Restrepo, S. & Basler, K. Growth regulation by Dpp: an essential role for Brinker  
621 and a non-essential role for graded signaling levels. *Development* **135**, 4003-4013 (2008).
- 622 27. Schwank, G. *et al.* Antagonistic growth regulation by Dpp and Fat drives uniform cell  
623 proliferation. *Dev. Cell.* **20**, 123-130 (2011).
- 624 28. Wartlick, O., Mumcu, P., Jülicher, F. & Gonzalez-Gaitan, M. Response to Comment on  
625 “Dynamics of Dpp Signaling and Proliferation Control”. *Science* **335**, 401 (2012).
- 626 29. Bosch, P. S., Ziukaite, R., Alexandre, C., Basler, K. & Vincent, J. P. Dpp controls growth and  
627 patterning in *Drosophila* wing precursors through distinct modes of action. *Elife* **6**,  
628 10.7554/eLife.22546 (2017).
- 629 30. Zhu, Y., Qiu, Y., Chen, W., Nie, Q. & Lander, A. D. Scaling a Dpp Morphogen Gradient through  
630 Feedback Control of Receptors and Co-receptors. *Dev. Cell.* **53**, 724-739.e14 (2020).
- 631 31. Ben-Zvi, D., Pyrowolakis, G., Barkai, N. & Shilo, B. Z. Expansion-repression mechanism for  
632 scaling the Dpp activation gradient in *Drosophila* wing imaginal discs. *Curr. Biol.* **21**, 1391-1396  
633 (2011).
- 634 32. Hamaratoglu, F., de Lachapelle, A. M., Pyrowolakis, G., Bergmann, S. & Affolter, M. Dpp  
635 signaling activity requires Pentagone to scale with tissue size in the growing *Drosophila* wing  
636 imaginal disc. *PLoS Biol.* **9**, e1001182 (2011).
- 637 33. Wartlick, O. *et al.* Dynamics of Dpp signaling and proliferation control. *Science* **331**, 1154-1159  
638 (2011).
- 639 34. Harmansa, S., Hamaratoglu, F., Affolter, M. & Caussinus, E. Dpp spreading is required for  
640 medial but not for lateral wing disc growth. *Nature* **527**, 317-322 (2015).
- 641 35. Venken, K. J. *et al.* MiMIC: a highly versatile transposon insertion resource for engineering  
642 *Drosophila melanogaster* genes. *Nat. Methods* **8**, 737-743 (2011).
- 643 36. Akiyama, T. & Gibson, M. C. Morphogen transport: theoretical and experimental controversies.  
644 *Wiley Interdiscip. Rev. Dev. Biol.* **4**, 99-112 (2015).
- 645 37. Kicheva, A. & Gonzalez-Gaitan, M. The Decapentaplegic morphogen gradient: a precise  
646 definition. *Curr. Opin. Cell Biol.* **20**, 137-143 (2008).
- 647 38. Matsuda, S., Harmansa, S. & Affolter, M. BMP morphogen gradients in flies. *Cytokine Growth*  
648 *Factor Rev.* **27**, 119-127 (2016).
- 649 39. Restrepo, S., Zartman, J. J. & Basler, K. Coordination of patterning and growth by the  
650 morphogen DPP. *Curr. Biol.* **24**, R245-55 (2014).
- 651 40. Burke, R. & Basler, K. Dpp receptors are autonomously required for cell proliferation in the  
652 entire developing *Drosophila* wing. *Development* **122**, 2261-2269 (1996).
- 653 41. Kim, J., Johnson, K., Chen, H. J., Carroll, S. & Laughon, A. *Drosophila* Mad binds to DNA and  
654 directly mediates activation of vestigial by Decapentaplegic. *Nature* **388**, 304-308 (1997).
- 655 42. Nellen, D., Affolter, M. & Basler, K. Receptor serine/threonine kinases implicated in the control  
656 of *Drosophila* body pattern by decapentaplegic. *Cell* **78**, 225-237 (1994).
- 657 43. Nellen, D., Burke, R., Struhl, G. & Basler, K. Direct and long-range action of a DPP morphogen  
658 gradient. *Cell* **85**, 357-368 (1996).
- 659 44. Lecuit, T. *et al.* Two distinct mechanisms for long-range patterning by Decapentaplegic in the  
660 *Drosophila* wing. *Nature* **381**, 387-393 (1996).
- 661 45. Matsuda, S. & Shimmi, O. Directional transport and active retention of Dpp/BMP create wing  
662 vein patterns in *Drosophila*. *Dev. Biol.* **366**, 153-162 (2012).

- 663 46. Pluckthun, A. Designed ankyrin repeat proteins (DARPin)s: binding proteins for research,  
664 diagnostics, and therapy. *Annu. Rev. Pharmacol. Toxicol.* **55**, 489-511 (2015).
- 665 47. Evans, C. J. *et al.* G-TRACE: rapid Gal4-based cell lineage analysis in *Drosophila*. *Nat. Methods*  
666 **6**, 603-605 (2009).
- 667 48. Matsuda, S. & Affolter, M. Dpp from the anterior stripe of cells is crucial for the growth of the  
668 *Drosophila* wing disc. *Elife* **6**, 10.7554/eLife.22319 (2017).
- 669 49. Aguilar, G., Vigano, M. A., Affolter, M. & Matsuda, S. Reflections on the use of protein binders  
670 to study protein function in developmental biology. *Wiley interdisciplinary reviews. Developmental*  
671 *biology*, e356 (2019).
- 672 50. Boersma, S. *et al.* Multi-Color Single-Molecule Imaging Uncovers Extensive Heterogeneity in  
673 mRNA Decoding. *Cell* **178**, 458-472.e19 (2019).
- 674 51. Gotzke, H. *et al.* The ALFA-tag is a highly versatile tool for nanobody-based bioscience  
675 applications. *Nat. Commun.* **10**, 4403-019-12301-7 (2019).
- 676 52. Tanenbaum, M. E., Gilbert, L. A., Qi, L. S., Weissman, J. S. & Vale, R. D. A protein-tagging  
677 system for signal amplification in gene expression and fluorescence imaging. *Cell* **159**, 635-646  
678 (2014).
- 679 53. Zhao, N. *et al.* A genetically encoded probe for imaging nascent and mature HA-tagged proteins  
680 in vivo. *Nat. Commun.* **10**, 2947-019-10846-1 (2019).
- 681 54. Adachi-Yamada, T., Fujimura-Kamada, K., Nishida, Y. & Matsumoto, K. Distortion of  
682 proximodistal information causes JNK-dependent apoptosis in *Drosophila* wing. *Nature* **400**, 166-  
683 169 (1999).
- 684 55. Adachi-Yamada, T. & O'Connor, M. B. Morphogenetic apoptosis: a mechanism for correcting  
685 discontinuities in morphogen gradients. *Dev. Biol.* **251**, 74-90 (2002).
- 686 56. Akiyama, T., User, S. D. & Gibson, M. C. Somatic clones heterozygous for recessive disease  
687 alleles of BMPR1A exhibit unexpected phenotypes in *Drosophila*. *Elife* **7**, 10.7554/eLife.35258  
688 (2018).
- 689 57. Barrio, L. & Milan, M. Boundary Dpp promotes growth of medial and lateral regions of the  
690 *Drosophila* wing. *Elife* **6**, 10.7554/eLife.22013 (2017).
- 691 58. Paul, L. *et al.* Dpp-induced Egfr signaling triggers postembryonic wing development in  
692 *Drosophila*. *Proc. Natl. Acad. Sci. U. S. A.* **110**, 5058-5063 (2013).
- 693 59. Bangi, E. & Wharton, K. Dpp and Gbb exhibit different effective ranges in the establishment of  
694 the BMP activity gradient critical for *Drosophila* wing patterning. *Dev. Biol.* **295**, 178-193 (2006).
- 695 60. Wartlick, O. *et al.* Dynamics of Dpp signaling and proliferation control. *Science* **331**, 1154-1159  
696 (2011).
- 697 61. Barrio, L. & Milan, M. Regulation of Anisotropic Tissue Growth by Two Orthogonal Signaling  
698 Centers. *Dev. Cell.* **52**, 659-672.e3 (2020).
- 699 62. Mii, Y *et al.*, <https://www.biorxiv.org/content/10.1101/2020.02.20.957860v1>
- 700 63. Groppe, J. *et al.* Biochemical and biophysical characterization of refolded *Drosophila* DPP, a  
701 homolog of bone morphogenetic proteins 2 and 4. *J. Biol. Chem.* **273**, 29052-29065 (1998).
- 702 64. Pluckthun, A. Ribosome display: a perspective. *Methods Mol. Biol.* **805**, 3-28 (2012).
- 703 65. Dreier, B. & Pluckthun, A. Rapid selection of high-affinity binders using ribosome display.  
704 *Methods Mol. Biol.* **805**, 261-286 (2012).
- 705 66. Norman, M., Vuilleumier, R., Springhorn, A., Gawlik, J. & Pyrowolakis, G. Pentagone  
706 internalises glypicans to fine-tune multiple signalling pathways. *Elife* **5**, 10.7554/eLife.13301 (2016).
- 707



Fig. 1

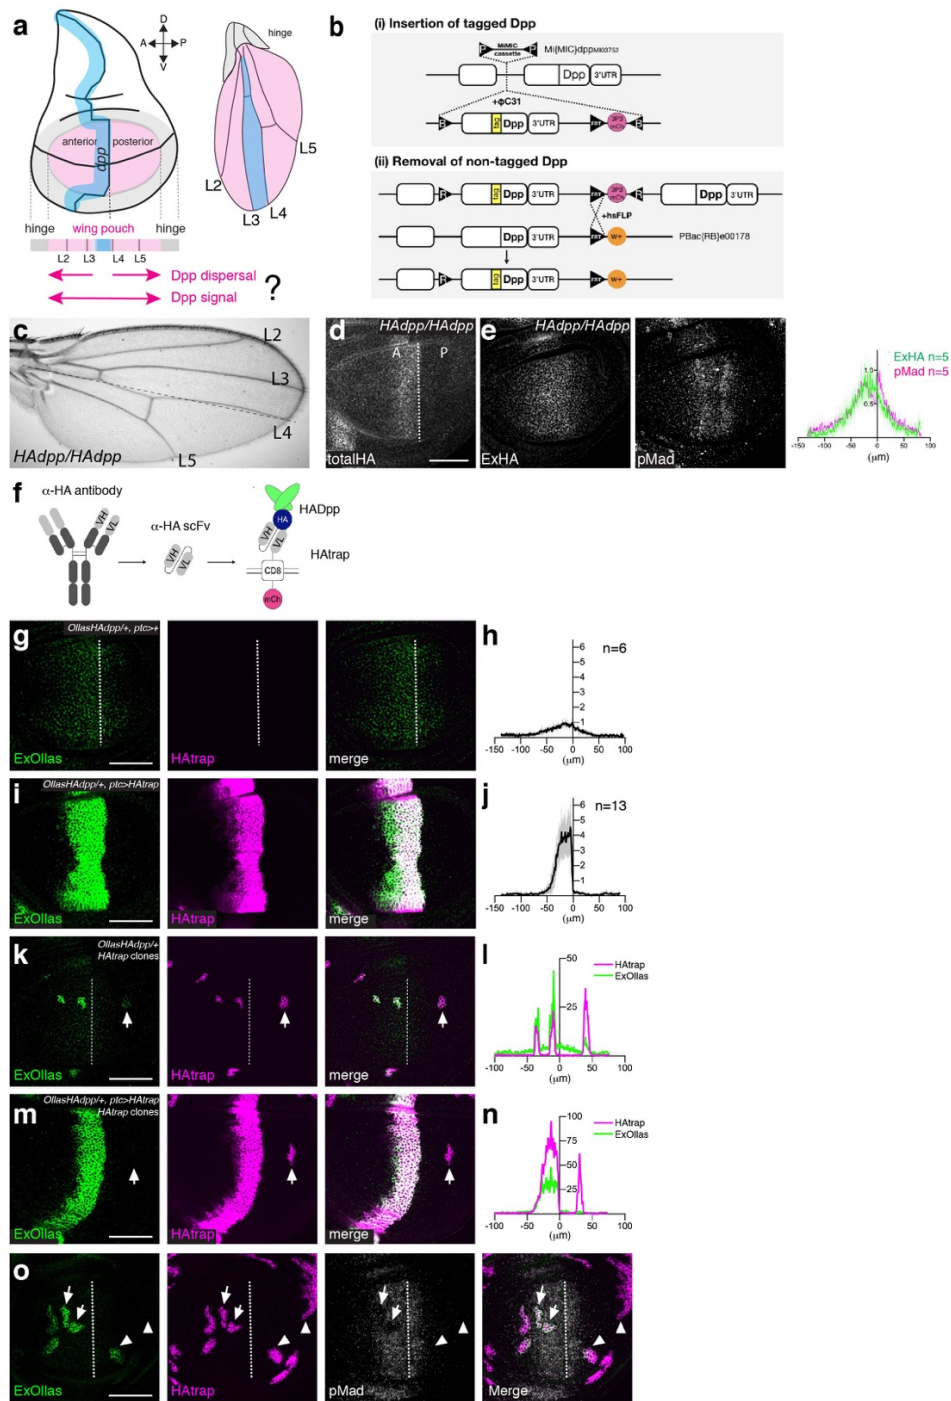

**Figure 1. Generation and characterization of HA trap**

**a**, A schematic view of the wing disc and the adult wing. **b**, A schematic view of a platform manipulating endogenous *dpp* locus. **c**, Adult wing of a homozygous *HA-dpp* fly. **d**,  $\alpha$ -HA staining of *HA-dpp* homozygous wing disc. **e**,  $\alpha$ -ExHA and  $\alpha$ -pMad staining of *HA-dpp* homozygous wing disc. Quantification of each staining. **f**, A schematic view of HA trap. **g**,  $\alpha$ -ExOllas, HA trap, and merge of control *Ollas-HA-dpp*<sup>+/+</sup> wing disc. **h**, Quantification of  $\alpha$ -ExOllas staining of (**g**). **i**,  $\alpha$ -ExOllas, HA trap, and merge of *Ollas-HA-dpp*<sup>+/+</sup> wing disc expressing HA trap using *ptc-Gal4*. **j**, Quantification of  $\alpha$ -ExOllas staining of (**i**). **k**,  $\alpha$ -ExOllas, HA trap, and merge of *Ollas-HA-dpp*<sup>+/+</sup> wing disc expressing HA trap clones. **l**, Quantification of  $\alpha$ -ExOllas and HA trap staining of (**k**). **m**,  $\alpha$ -ExOllas, HA trap, and merge of *Ollas-HA-dpp*<sup>+/+</sup> wing disc expressing HA trap using *ptc-Gal4* as well as HA trap clones. **n** Quantification of  $\alpha$ -ExOllas and HA trap staining of (**m**). **o**,  $\alpha$ -ExOllas, HA trap, pMad and merge of *Ollas-HA-dpp*<sup>+/+</sup> wing disc expressing HA trap clones. Dashed white lines mark the A-P compartment border. Scale bar 50  $\mu$ m.

708  
709  
710  
711  
712  
713  
714  
715  
716  
717  
718  
719  
720  
721

**Fig. 2**

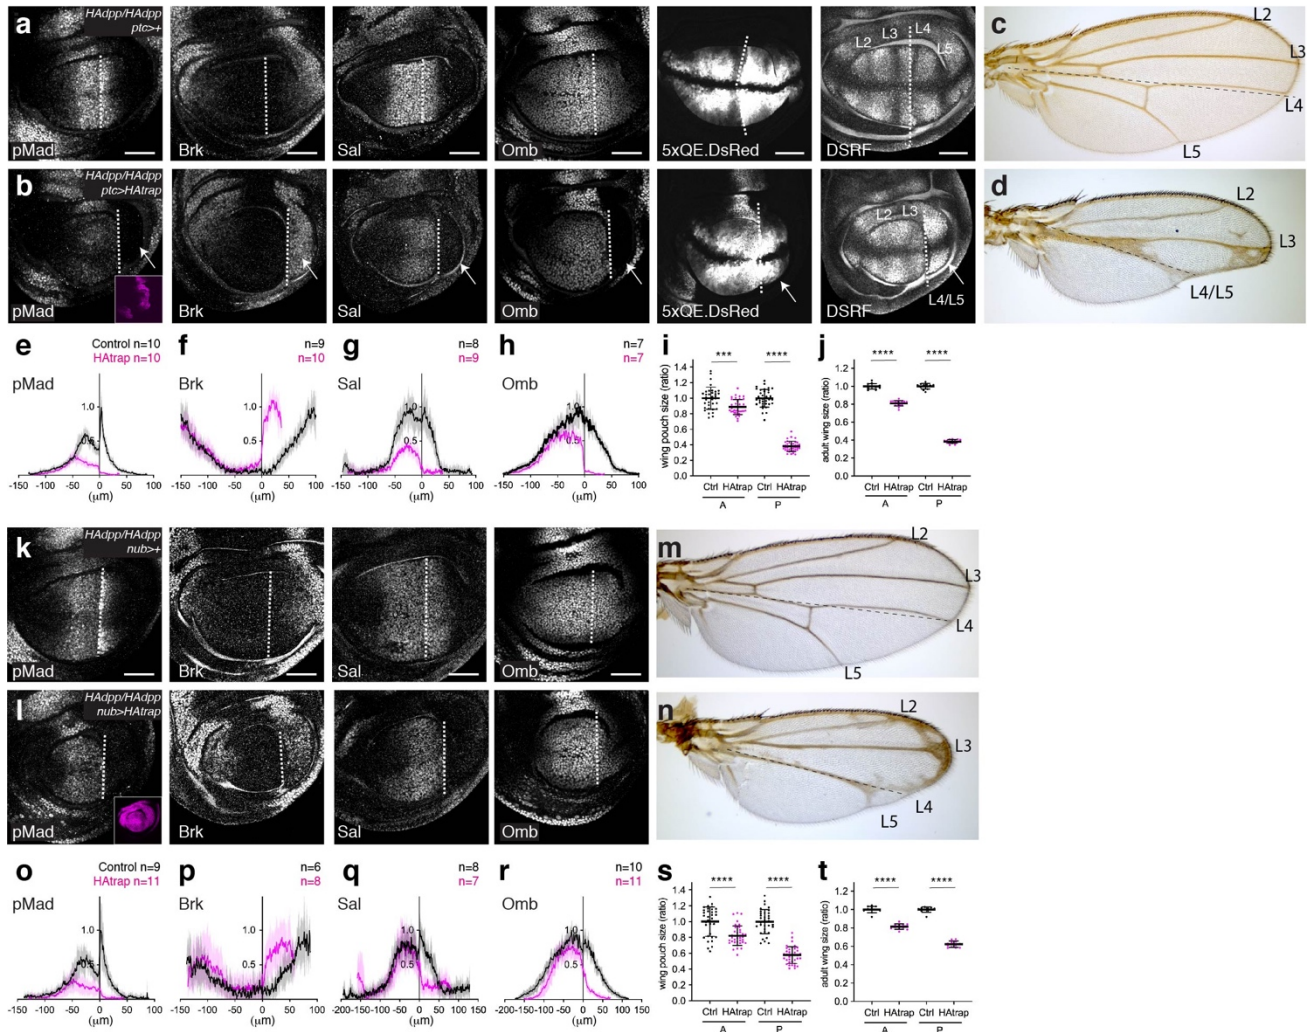

**Figure 2. Blocking Dpp dispersal by HA trap causes minor and asymmetric patterning and growth defects**

**a-b**,  $\alpha$ -pMad,  $\alpha$ -Brk,  $\alpha$ -Sal,  $\alpha$ -Omb, 5xQE.DsRed, DSRF, and Dpp trap (mCherry) (inset) of control wing disc (**a**) and wing disc expressing HA trap using *ptc-Gal4* (**b**). **c-d**, Control adult wing (**c**), and adult wing expressing HA trap using *ptc-Gal4* (**d**). **e-h**, Quantification of  $\alpha$ -pMad (**e**),  $\alpha$ -Brk (**f**),  $\alpha$ -Sal (**g**),  $\alpha$ -Omb (**h**) staining in (**a-b**). **i-j**, Quantification of compartment size of wing pouch (**i**) and adult wing (**j**) upon HA trap expression using *ptc-Gal4*. **k-l**,  $\alpha$ -pMad,  $\alpha$ -Brk,  $\alpha$ -Sal,  $\alpha$ -Omb, 5xQE.DsRed, DSRF, and Dpp trap (mCherry) (inset) of control wing disc (**k**) and wing disc expressing HA trap using *nub-Gal4* (**l**). **m-n**, Control adult wing (**m**) and adult wing expressing HA trap using *nub-Gal4* (**n**). **o-r**, Quantification of  $\alpha$ -pMad (**o**),  $\alpha$ -Brk (**p**),  $\alpha$ -Sal (**q**),  $\alpha$ -Omb (**r**) staining in (**k-l**). **s-t**, Quantification of compartment size of wing pouch (**s**) and adult wing (**t**) upon HA trap expression using *nub-Gal4*. Dashed white lines mark the A-P compartment border. Scale bar 50  $\mu$ m.

722  
723  
724  
725  
726  
727  
728  
729  
730  
731  
732  
733  
734  
735  
736

**Fig.3**

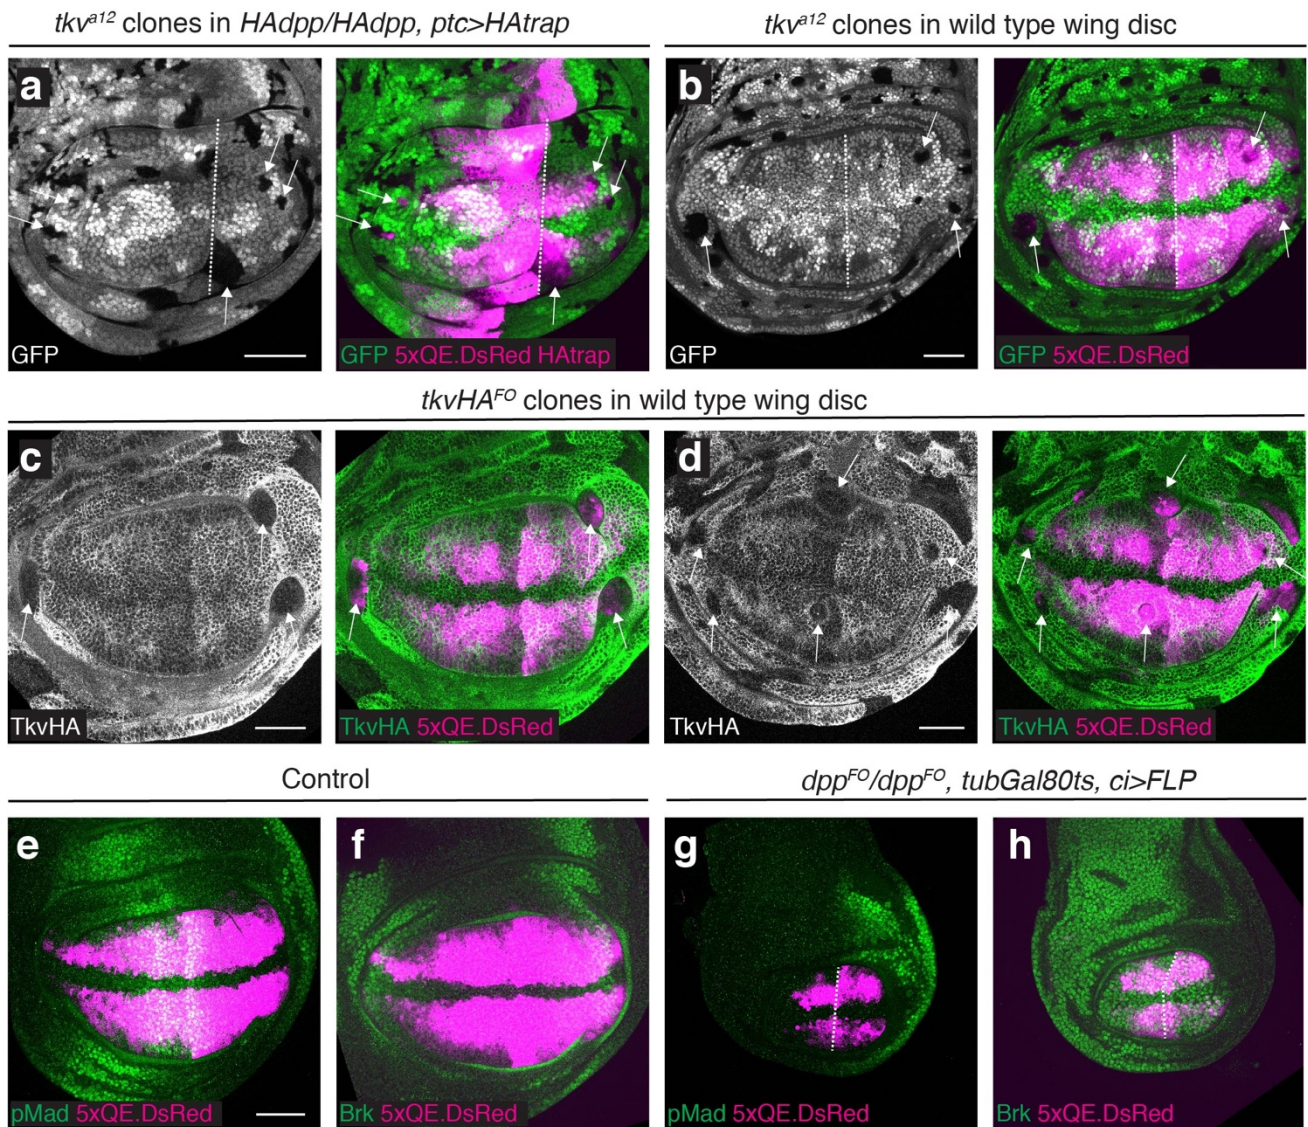

**Figure 3. Lateral wing pouch growth without Dpp signaling**

**a-b**, *tkv<sup>a12</sup>* clones (indicated by the absence of GFP signal) induced in *HA-dpp/HA-dpp, ptc>HA trap* wing discs (**a**) and in wild type wing discs (**b**). **c-d**, *tkvHA<sup>FO</sup>* clones (indicated by the absence of  $\alpha$ -HA staining) in wild type wing discs. Clones were induced at 60-72 hr AEL (after egg laying) during mid-second to early third instar stages. **e-h**,  $\alpha$ -pMad and 5xQE.DsRed (**e, g**) and  $\alpha$ -Brk and 5xQE.DsRed (**f, h**) of control wing disc (**e, f**) and wing disc removing *dpp* using *ci-Gal4* with *tubGal80s* (**g, h**). Crosses were shifted from 18°C to 29°C at 4day AEL (early second instar). Scale bar 50  $\mu$ m.

737  
738  
739  
740  
741  
742  
743  
744  
745  
746  
747

Fig.4

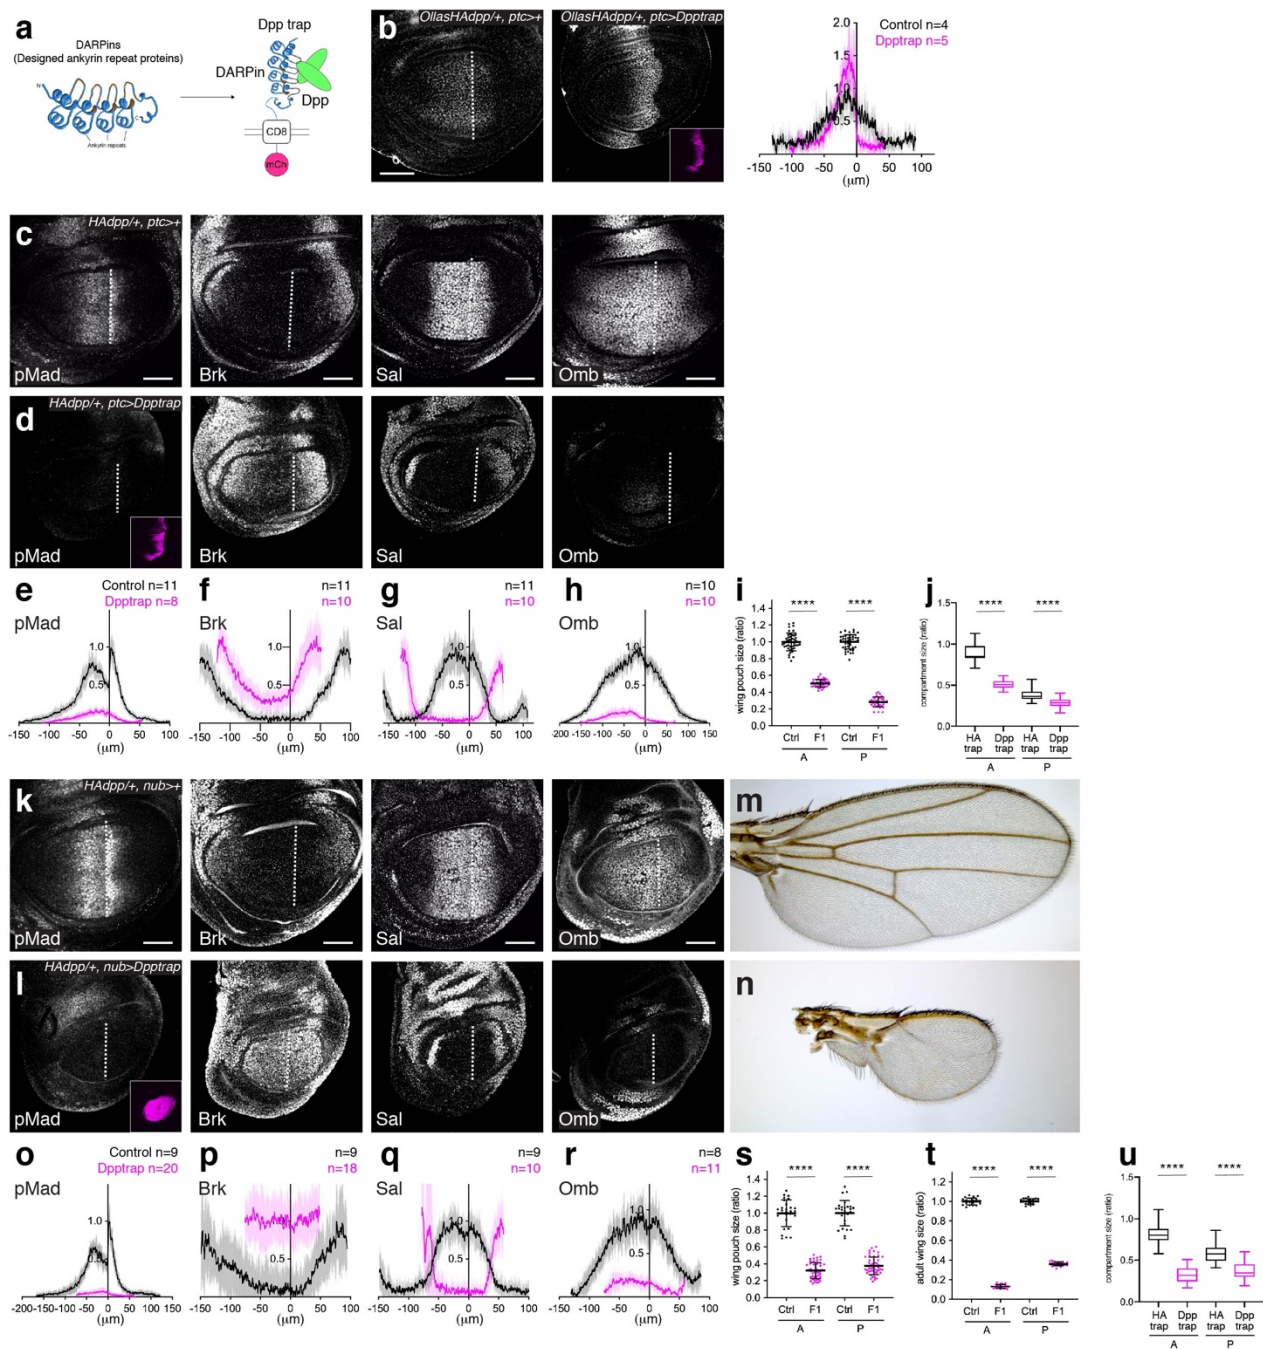

748  
749  
750  
751  
752  
753  
754  
755  
756  
757  
758  
759  
760  
761

Fig.5

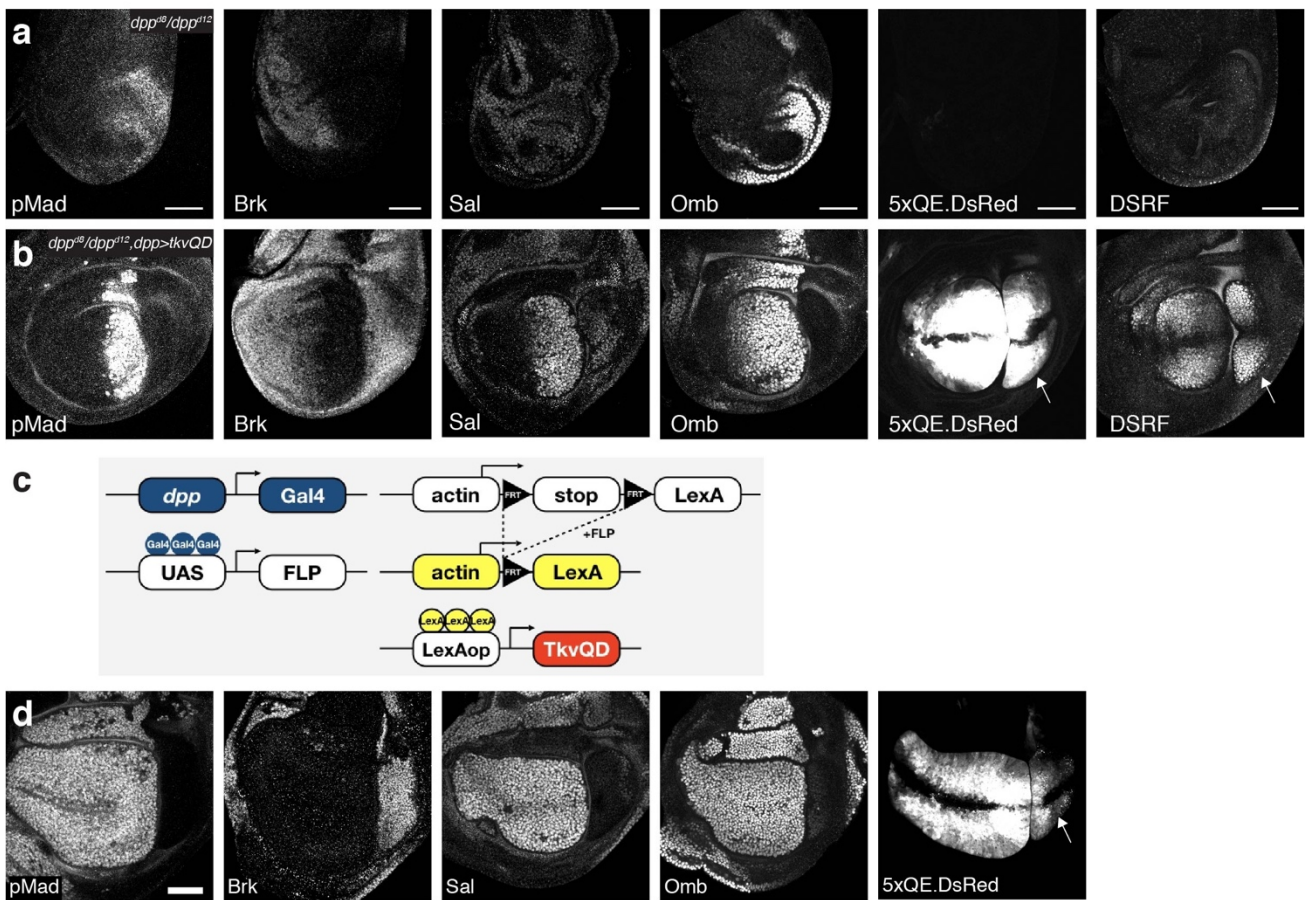

762  
763  
764  
765  
766  
767  
768  
769  
770  
771  
772  
773  
774  
775  
776  
777  
778

**Figure. 5 Rescue of *dpp* mutant by cell-autonomous Dpp signaling mimics phenotypes caused by HA trap**

**a-b**,  $\alpha$ -pMad,  $\alpha$ -Brk,  $\alpha$ -Sal,  $\alpha$ -Omb, 5xQE.DsRed, and DSRF staining of (a) *dpp*<sup>d8/d12</sup> wing disc and (b) *dpp*<sup>d8/d12</sup>, *dpp*>*tkvQD* wing disc. **c**, A schematic view of converting *dpp-Gal4* into a *LexA* driver, which is permanently expressed in lineages of *dpp-Gal4* expressing cells. In this experimental setup, the lineages of *dpp-Gal4* (including lineages of non-specific *dpp-Gal4* expression) will permanently activate *TkvQD* and thus pMad signaling. **d**,  $\alpha$ -pMad,  $\alpha$ -Brk,  $\alpha$ -Sal,  $\alpha$ -Omb staining, and 5xQE.DsRed signal of *dpp*<sup>d8/d12</sup>, *dpp-Gal4*>*UAS-FLP*, *act*>*y+*>*LexA-LHG*, *LOP-tkvQD* wing disc. Arrows indicate posterior wing pouch growth rescued by anterior Dpp signaling. Scale bar 50  $\mu$ m. Note that while uniformly upregulated in the A compartment, pMad (which reflects the lineages of *dpp-Gal4*) was absent in the P compartment. Nevertheless, the 5xQE.DsRed reporter was still activated in both compartments.

Fig.6

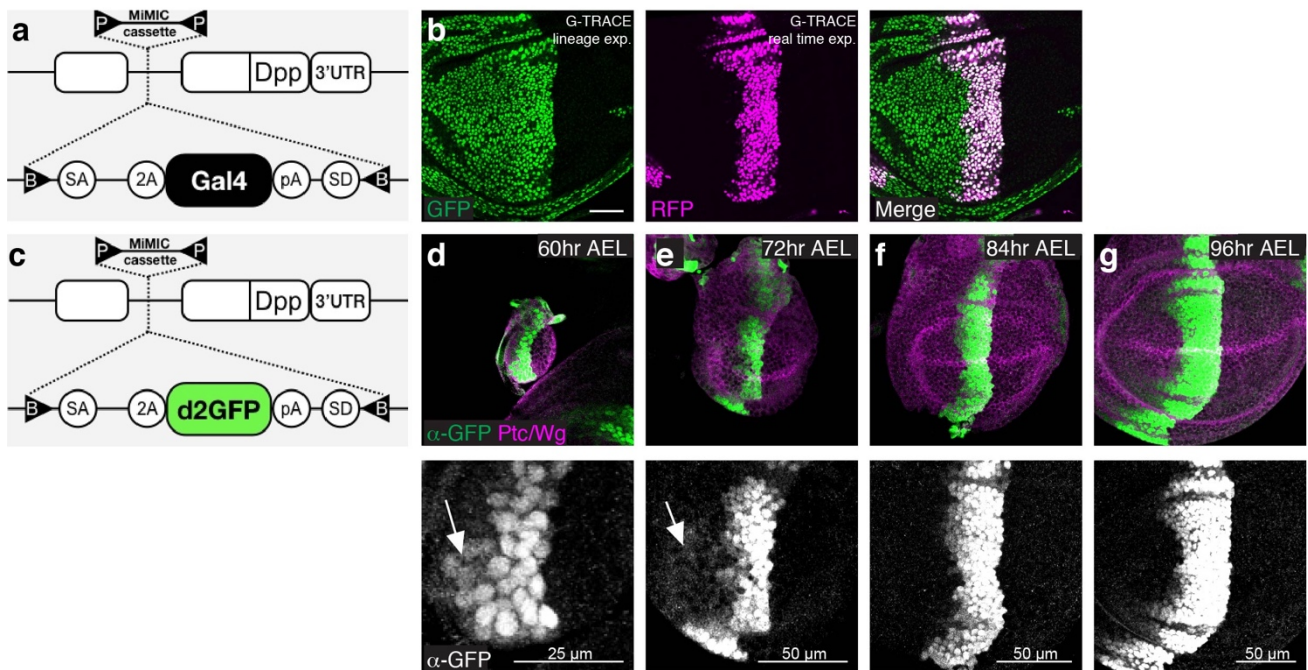

779  
780  
781  
782  
783  
784  
785  
786  
787  
788  
789

**Figure 6. Initial uniform *dpp* transcription in the anterior compartment**

**a-e**, *dpp* transcription dynamics during wing development. **(a)** a schematic view of *d2GFP* insertion into the *dpp* locus. **(b-e)**  $\alpha$ -GFP and  $\alpha$ -Ptc/Wg staining of wing disc expressing the *d2GFP* reporter at mid-second instar stage (60hr AEL) **(b)**, at early third instar stage (72hr AEL) **(c)**, at mid-third instar stage (84hr AEL) **(d)** at mid- to late- third instar stage (96hr AEL) **(e)**. Arrow indicates *dpp* transcription outside the stripe of cells. **f-g**, Lineages of endogenous *dpp-Gal4* during wing development. **f**, a schematic view of a *Gal4* insertion into the *dpp* locus. **g**, G-TRACE analysis of the endogenous *dpp-Gal4*. Scale bar 50  $\mu$ m unless otherwise mentioned.

Fig.7

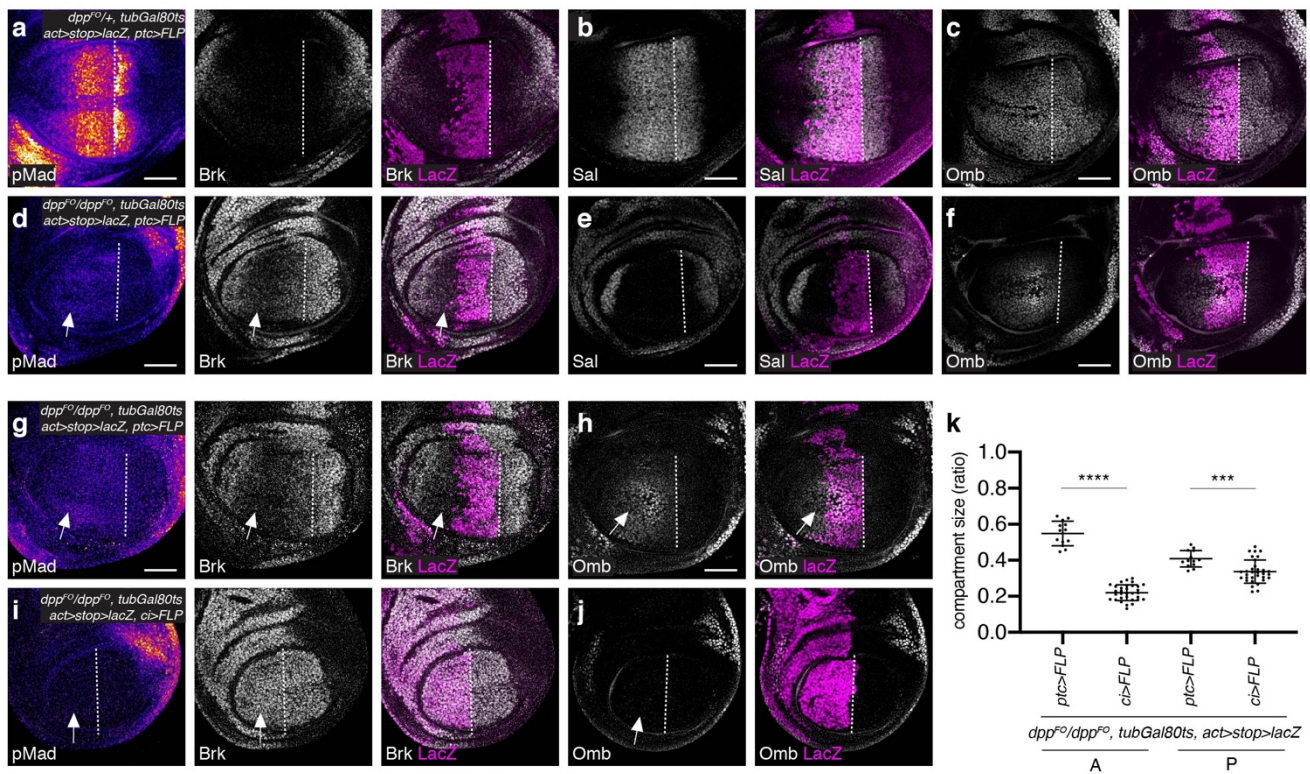

790  
791  
792  
793  
794  
795  
796  
797  
798  
799  
800  
801  
802

**Figure 7. Transient anterior *dpp* source outside Sal domain is required for anterior patterning and growth**

**a-f**,  $\alpha$ -pMad,  $\alpha$ -Brk, and  $\alpha$ -LacZ (**a, d**),  $\alpha$ -Sal and  $\alpha$ -LacZ (**b, e**),  $\alpha$ -Omb and  $\alpha$ -LacZ (**c, f**) staining of control wing disc (**a-c**) and wing discs removing *dpp* using *ptc-Gal4* from mid-second instar (**d-f**). **g-j**,  $\alpha$ -pMad,  $\alpha$ -Brk, and  $\alpha$ -LacZ (**g, i**),  $\alpha$ -Omb and  $\alpha$ -LacZ (**h, j**) staining of wing disc removing *dpp* using *ptc-Gal4* (**g, h**) and using *ci-Gal4* (**i, j**) from mid-second instar. **k**, Quantification of each compartment size of wing discs removing *dpp* using *ptc-Gal4* or *ci-Gal4*. Crosses were shifted from 18°C to 29°C at 5day AEL (mid-second instar).  $\alpha$ -LacZ staining marks the region where *dpp* is removed upon FLP expression. Dashed white lines mark the A-P compartment border. Scale bar 50  $\mu$ m.

Fig. 8

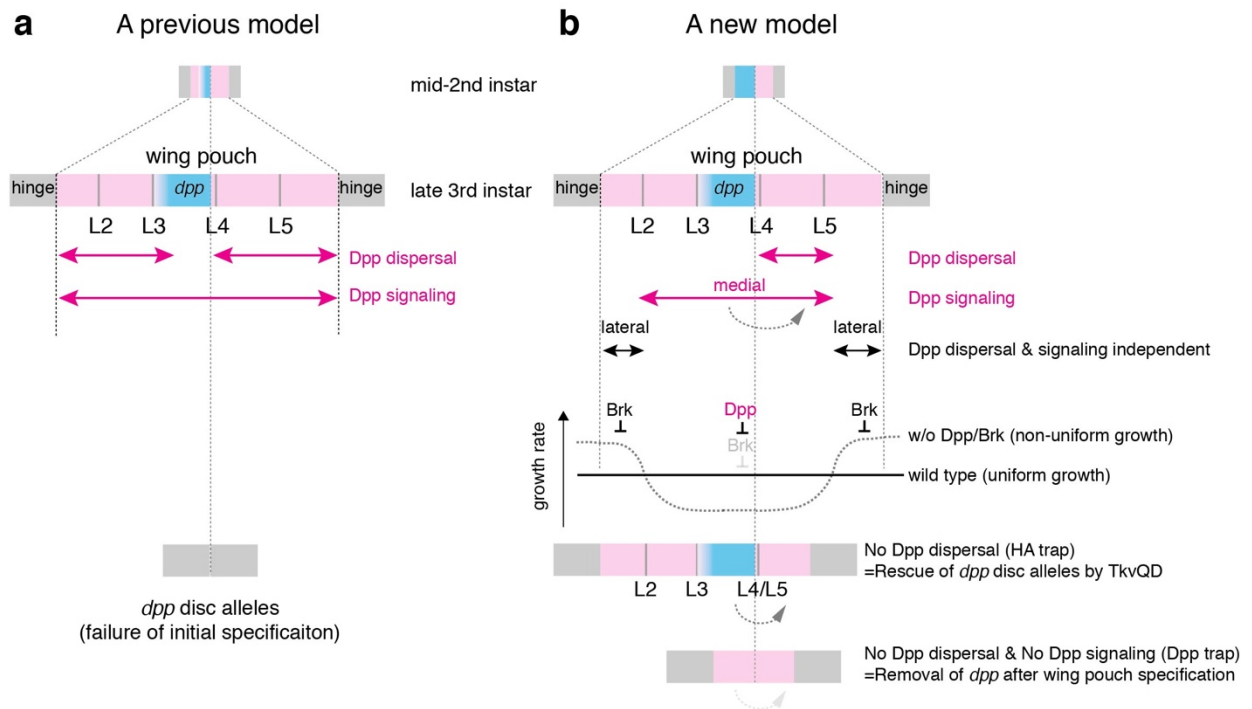

803

804

805 **Figure 8. Distinct roles of Dpp dispersal and signaling for wing patterning and growth**

806 **a**, Previous studies are based on the assumption that Dpp dispersal from the anterior stripe of cells  
 807 controls patterning and growth of the entire wing pouch as implicated by complete lack of wing  
 808 pouch by *dpp* disc alleles. All the growth models trying to explain the uniform growth were built on  
 809 the assumption. **b**, The present study challenges the assumption and reveals distinct roles of Dpp  
 810 dispersal and signaling. While critical for the posterior patterning and medial growth, Dpp dispersal  
 811 is largely dispensable for anterior patterning and growth. In contrast, cell-autonomous Dpp signaling  
 812 in the anterior source cells is required and sufficient for anterior patterning and growth as well as for  
 813 posterior growth (though permissively). Anterior patterning and growth without Dpp dispersal  
 814 requires cell-autonomous Dpp signaling through a memory of earlier signaling by initial uniform *dpp*  
 815 expression. Contrast with the severe *dpp* disc alleles, neither Dpp dispersal nor signaling is critical  
 816 for the lateral growth since the wing pouch specification. These results challenge the Dpp dispersal-  
 817 based patterning and growth mechanisms, and lead us to propose a refined growth equalization  
 818 model, in which Dpp controls medial wing pouch growth by removing a growth repressor Brk, and  
 819 Brk repress the lateral wing pouch growth with higher proliferative nature to equalize growth rates.  
 820 Unlike previously thought, both the Dpp signaling-dependent medial region and -independent lateral  
 821 region exist within the wing pouch.

822



Extended Data Fig. 1

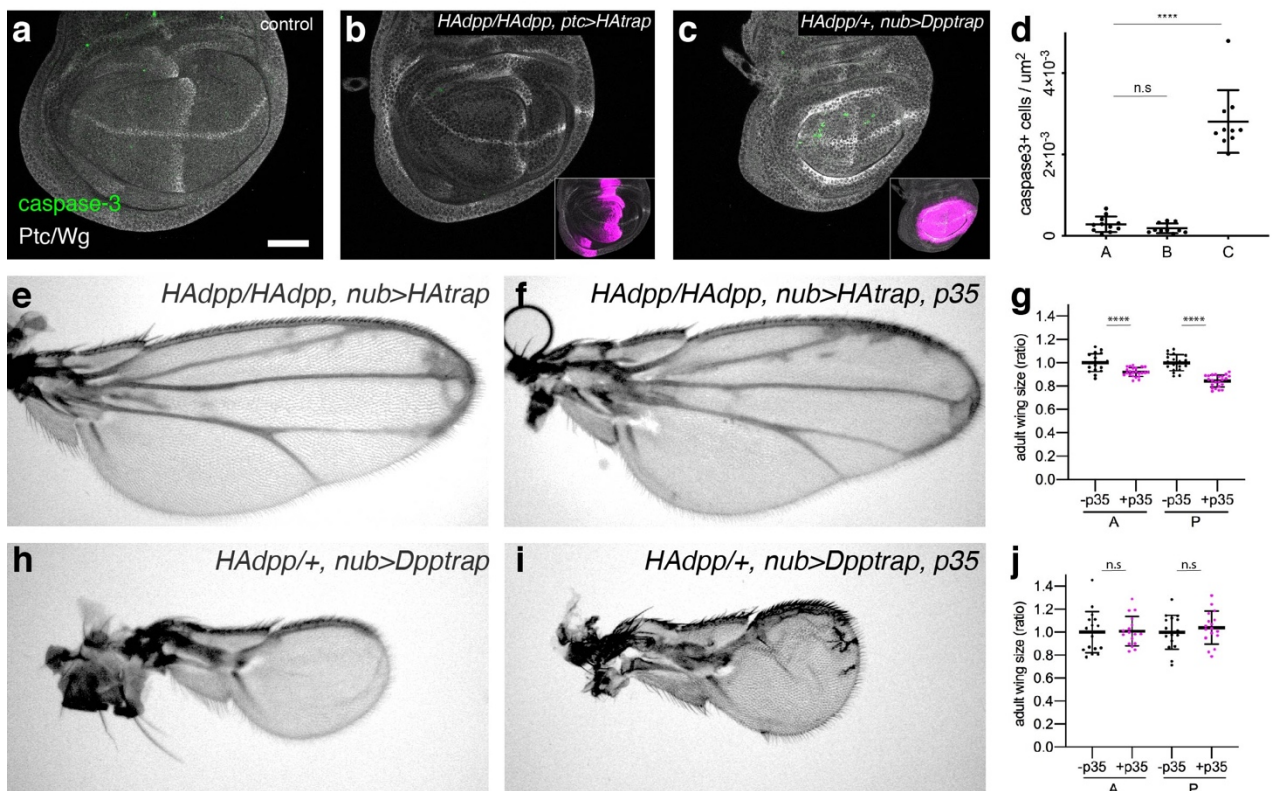

823  
824  
825  
826  
827  
828  
829  
830  
831  
832  
833

**Extended Data Fig 1. Blocking cell death does not rescue growth defects caused by HA trap or Dpp trap**

**a-d**,  $\alpha$ -Caspase-3 and  $\alpha$ -Ptc/Wg expression of control wing disc (**a**), *HA-dpp/HA-dpp, ptc>HA trap* disc (**b**), and *HA-dpp/+, nub>Dpp trap* disc (**c**). The insets show HA trap (mCherry) expression. Scale bar 50  $\mu\text{m}$ . **(d)** Quantification of the number of  $\alpha$ -Caspase-3 positive cells in (**a-c**). **e-g**, Adult wing of *HA-dpp/HA-dpp, nub>HA trap* (control) (**e**) and *HA-dpp/HA-dpp, nub>HA trap, p35* (**f**). **g**, Quantification of compartment size of (**e, f**). **h-j**, Adult wing of *HA-Dpp/+, nub>Dpp trap* (control) (**h**) and *HA-dpp/+, nub>Dpp trap, p35* (**i**). **j**, Quantification of compartment size of (**h, i**).

## Extended Data Fig. 2

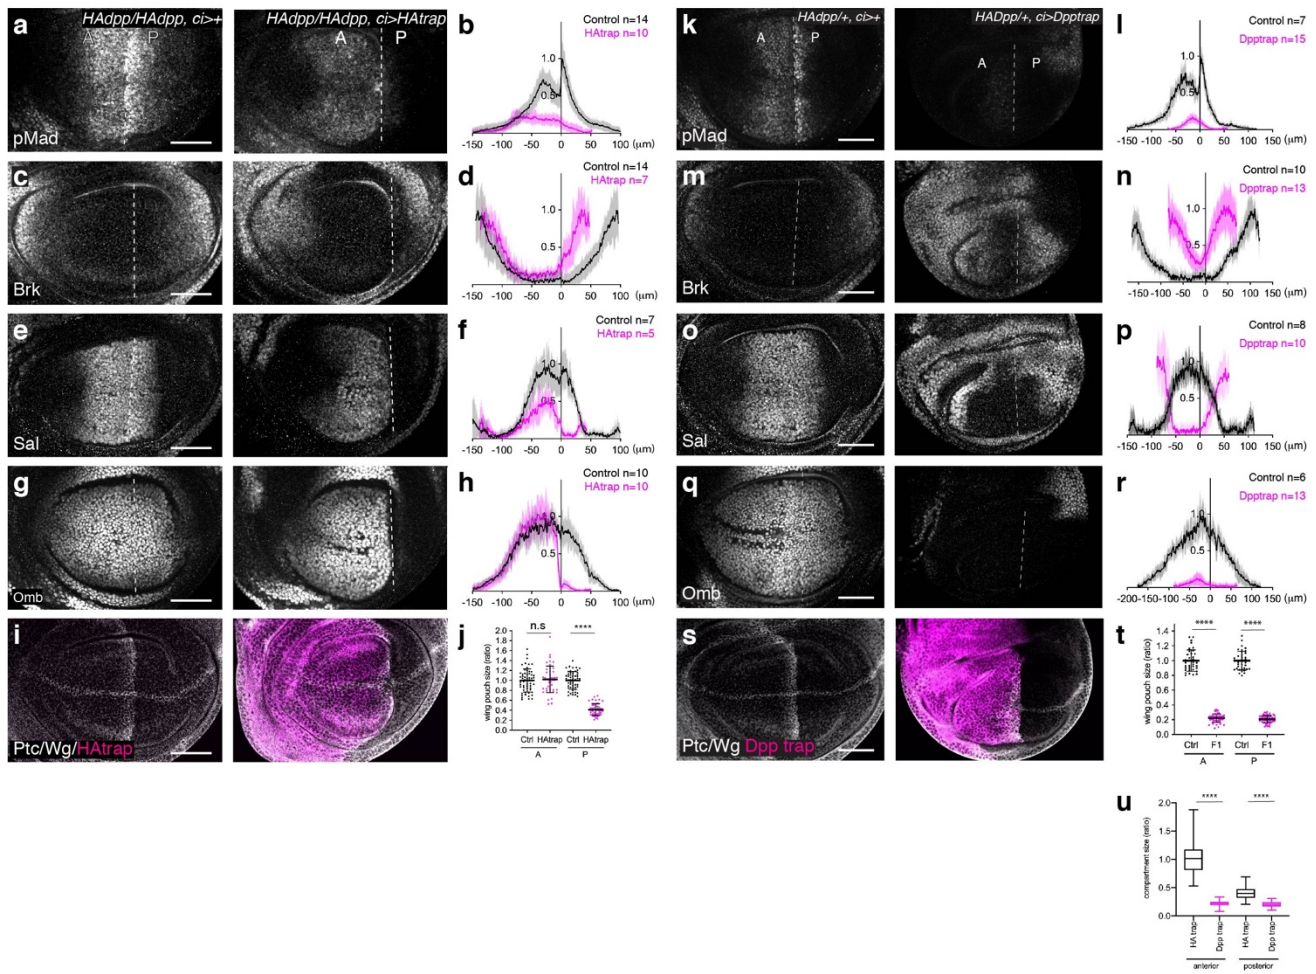

834

835

### 836 Extended Data Fig 2. Patterning and growth defects by HA trap and Dpp trap expression 837 using *ci-Gal4*

838 a–j, Patterning and growth defects by HA trap. (a, c, e, g, i)  $\alpha$ -pMad (a),  $\alpha$ -Brk (c),  $\alpha$ -Sal (e),  $\alpha$ -Omb  
839 (g),  $\alpha$ -Ptc/Wg staining and HA trap (mCherry) (i) of control *HA-dpp/HA-dpp, ci>+* (left) and *HA-*  
840 *dpp/HA-dpp, ci>HA trap* (right). (b, d, f, h) Quantification of (a, c, e, g), respectively. (j)  
841 Quantification of compartment size of wing pouch expressing HA trap using *ci-Gal4*. k–t, Patterning  
842 and growth defects by Dpp trap. (k, m, o, q, s)  $\alpha$ -pMad (k),  $\alpha$ -Brk (m),  $\alpha$ -Sal (o),  $\alpha$ -Omb (q),  $\alpha$ -  
843 Ptc/Wg staining and HA trap (mCherry) (s) of control *HA-dpp/+ , ci>+* (left) and *HA-dpp/+ , ci>Dpp*  
844 *trap* (right). (l, n, p, r, t) Quantification of (k, m, o, q, s) respectively. t, Quantification of compartment  
845 size of wing pouch expressing Dpp trap using *ci-Gal4*. u, Comparison of compartment size of wing  
846 pouch upon HA trap and Dpp trap expression using *ci-Gal4* (comparison of Extended Data Fig. 1j and  
847 Extended Data Fig. 1t). Dashed white lines mark the A-P compartment border. Scale bar 50  $\mu$ m.  
848

Extended Data Fig. 3

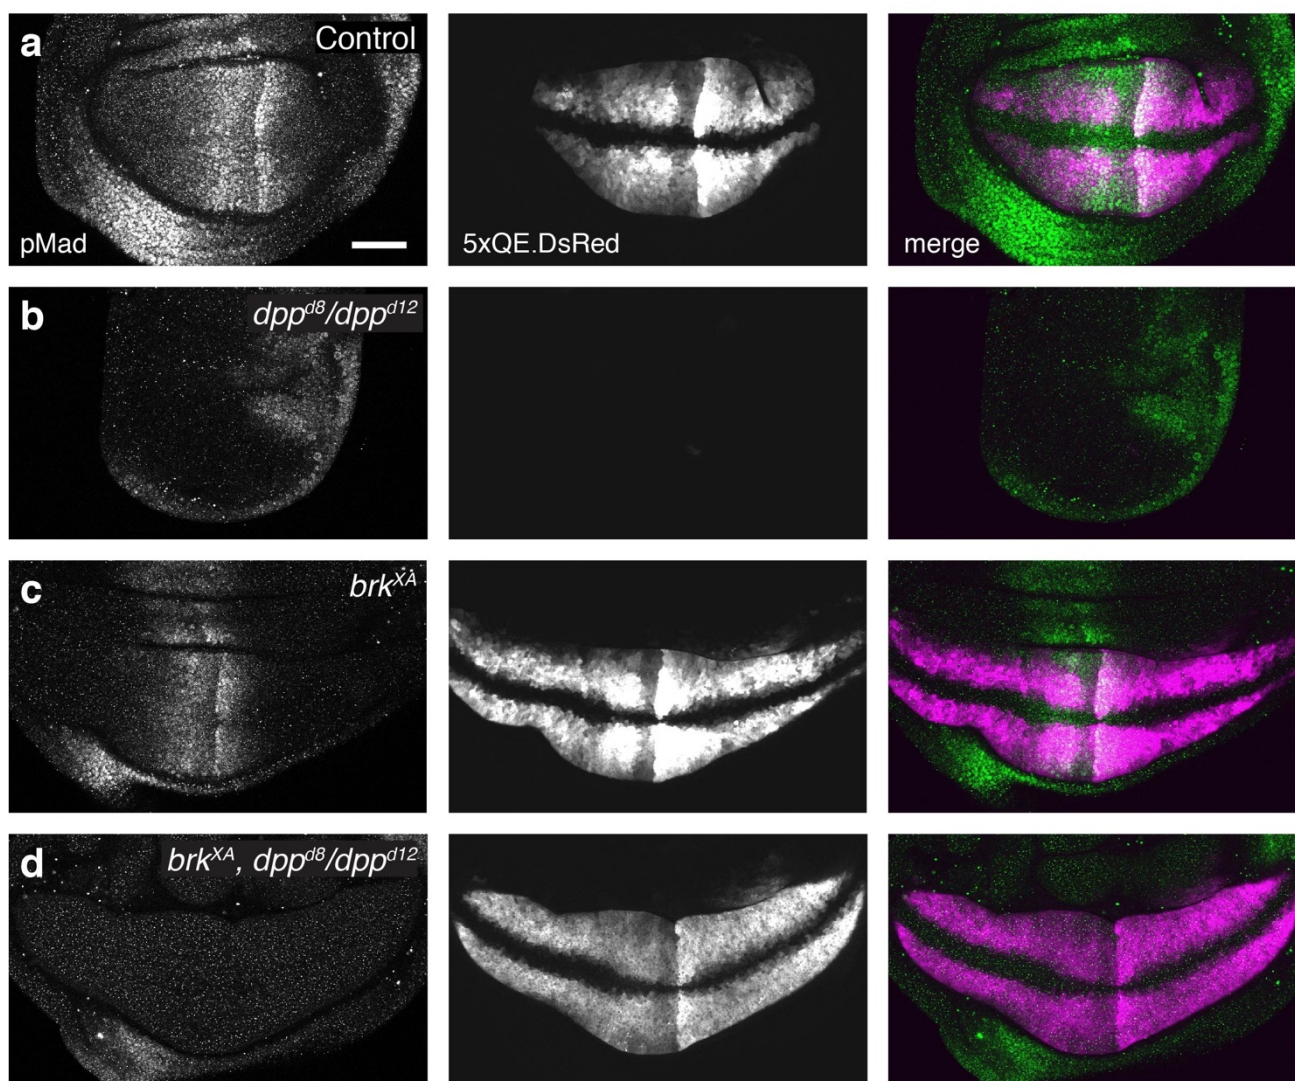

849  
850  
851  
852  
853  
854

**Extended Data Fig. 3** *5xQE.DsRed* reporter expression is Dpp signaling independent  
**a-d**,  $\alpha$ -pMad, *5xQE.DsRed*, and merge of control (**a**), *dpp<sup>d8</sup>/dpp<sup>d12</sup>* (**b**), *brk<sup>XA</sup>* (**c**), and *brk<sup>XA</sup>; dpp<sup>d8</sup>/dpp<sup>d12</sup>* (**d**) wing discs. Scale bar 50  $\mu$ m.

## Extended Data Fig. 4

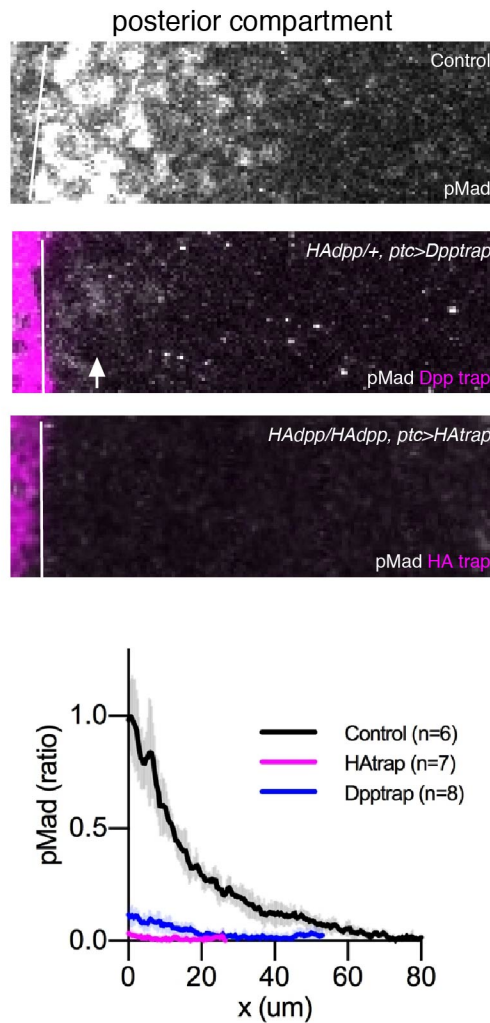

855

856

857 **Extended Data Fig. 4 HA trap can trap Dpp more efficiently than Dpp trap**

858  $\alpha$ -pMad, Dpp trap or HA trap (mCherry) in the P compartment of control wing disc (top), wing disc

859 expressing Dpp trap using *ptc-Gal4* (middle), wing disc expressing Dpp trap using *ptc-Gal4* (bottom)

860 wing disc. Quantification of pMad signal. Arrow indicates pMad signal by leaked Dpp from Dpp trap.

861

Extended Data Fig. 5

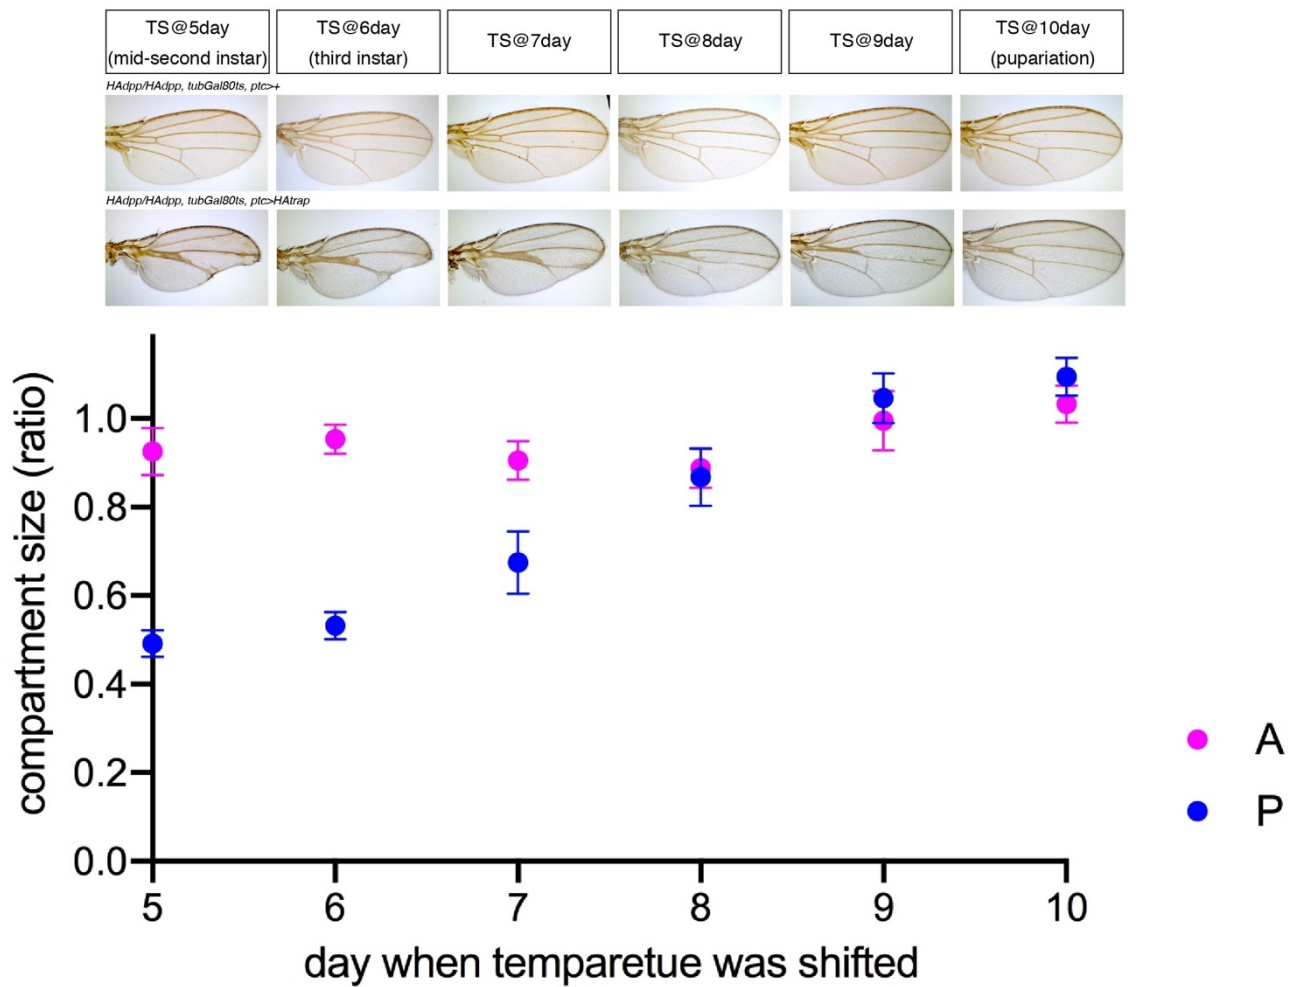

862  
863

864 **Extended Data Fig. 5 Relatively normal anterior patterning and growth by blocking Dpp**  
865 **dispersal at different time points**

866 Control adult wings and adult wings expressing HA trap using *ptc-Gal4* at different time points.  
867 Crosses were shifted from 18°C to 29°C at indicated time point. A and P compartment size normalized  
868 against each control compartment size were plotted.  
869

## Extended Data Fig. 6

*tkvHA<sup>FO</sup>/tkvHA<sup>FO</sup>, tubGal80ts, ci>FLP*

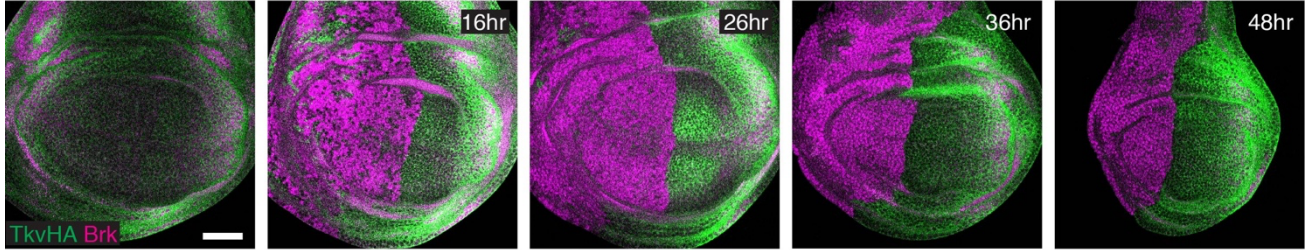

870  
871  
872  
873  
874  
875  
876

**Extended Data Fig. 6 Immediate de-repression of Brk by genetic removal of *tkv***  
 $\alpha$ -HA (TkvHA<sup>FO</sup>) and  $\alpha$ -Brk staining of wing discs in which *tkv* was genetically removed from A compartment from different time points. Time shown in each figure indicates the time of dissection after temperature shift. Scale bar 50  $\mu$ m.

877

Extended Data Fig. 7

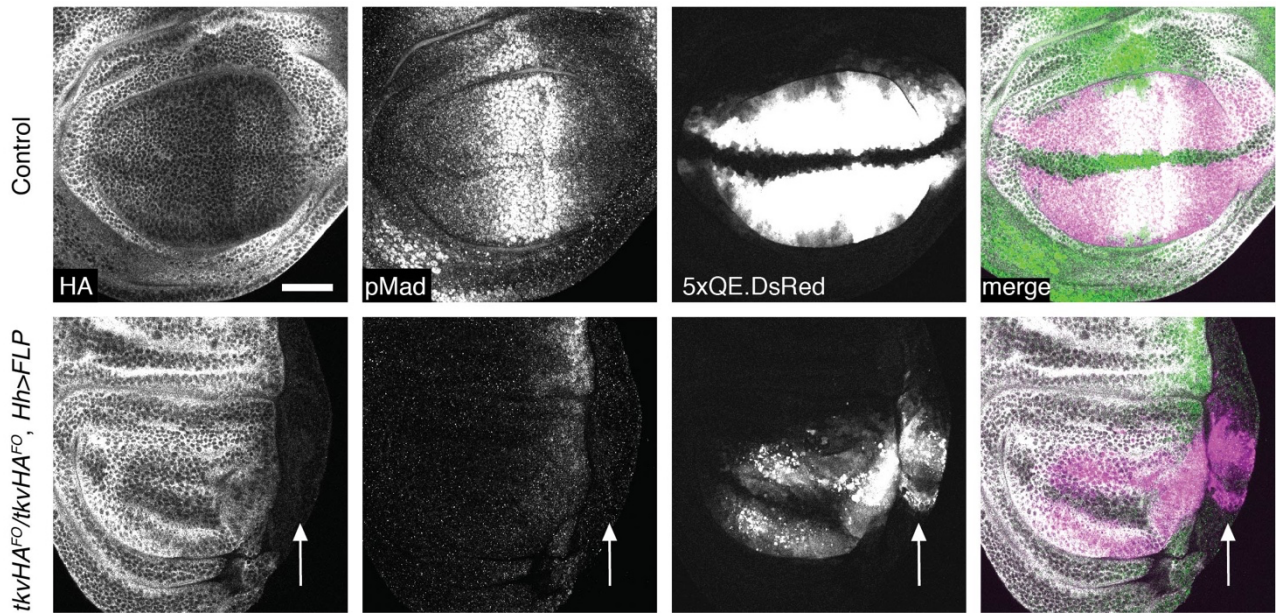

878  
879

880 **Extended Data Fig. 7 A part of posterior wing pouch can grow even after removal of posterior**  
881 ***tkv* from the embryonic stage**

882  $\alpha$ -HA (TkvHA<sup>FO</sup>),  $\alpha$ -pMad, 5xQE.DsRed, and merge of control wing disc and wing disc removing  
883 *tkv* from the entire P compartment from the embryonic stage. Upon removal of *tkv* from the P  
884 compartment, the 5xQE.DsRed reporter remained expressed (arrow) despite complete loss of pMad  
885 signal and severe growth defects in the P compartment. Note that anterior pMad signal was also  
886 affected probably because Hh target *dpp* expression is affected by the reduced number of Hh producing  
887 posterior cells.

888  
889
